# Supplementary material
Source: publisher figshare collection journal article supplement (https://sage.figshare.com/ndownloader/files/22782110)
Supplement: Supplementary file 1 [file 22782110]

## Sheet: Enrichment
GroupID	Category	Term	Description	LogP	InTerm_InList	Symbols
1_Summary	GO Cellular Components	GO:0062023	collagen-containing extracellular matrix	-25.8315	41/359	Anxa5,Bgn,Serpinh1,Col12a1,Col18a1,Col3a1,Col4a1,Col4a2,Col5a1,Col5a2,Col6a1,Col7a1,Col1a1,Col1a2,Ctsb,Ctsl,Dcn,Ecm1,Eln,Fbln1,Fbln2,Fbn1,Fn1,Hsp90aa1,Hspg2,Igf1,Lgals1,Lgals3,Lox,Mgp,Mmp9,Nid1,Plxna2,Serpinb6a,Thbs2,Vwf,Igfbp7,Pxdn,Emilin1,Npnt,Cspg4,Apoe,Bcl3,Cyp1b1,Hyal1,Lpl,Foxc1,Mmp12,Mpo,Ddr2,Tnf,Pla2g7,Myo1e,Apob,Sh3pxd2b,Flrt2,Nes,Tuba1c,Tubb6
1_Member	GO Cellular Components	GO:0062023	collagen-containing extracellular matrix	-25.8315	41/359	Anxa5,Bgn,Serpinh1,Col12a1,Col18a1,Col3a1,Col4a1,Col4a2,Col5a1,Col5a2,Col6a1,Col7a1,Col1a1,Col1a2,Ctsb,Ctsl,Dcn,Ecm1,Eln,Fbln1,Fbln2,Fbn1,Fn1,Hsp90aa1,Hspg2,Igf1,Lgals1,Lgals3,Lox,Mgp,Mmp9,Nid1,Plxna2,Serpinb6a,Thbs2,Vwf,Igfbp7,Pxdn,Emilin1,Npnt,Cspg4
1_Member	GO Biological Processes	GO:0043062	extracellular structure organization	-23.6289	37/317	Apoe,Bcl3,Serpinh1,Col12a1,Col18a1,Col3a1,Col4a1,Col4a2,Col5a1,Col5a2,Col1a1,Col1a2,Cyp1b1,Eln,Fbln1,Fbln2,Fn1,Hspg2,Hyal1,Lgals3,Lox,Lpl,Foxc1,Mmp12,Mmp9,Mpo,Nid1,Ddr2,Tnf,Pla2g7,Pxdn,Myo1e,Emilin1,Npnt,Apob,Sh3pxd2b,Flrt2
1_Member	GO Cellular Components	GO:0031012	extracellular matrix	-23.0475	43/474	Anxa5,Apoe,Bgn,Serpinh1,Col12a1,Col18a1,Col3a1,Col4a1,Col4a2,Col5a1,Col5a2,Col6a1,Col7a1,Col1a1,Col1a2,Ctsb,Ctsl,Dcn,Ecm1,Eln,Fbln1,Fbln2,Fbn1,Fn1,Hsp90aa1,Hspg2,Igf1,Lgals1,Lgals3,Lox,Mgp,Mmp12,Mmp9,Nid1,Plxna2,Serpinb6a,Thbs2,Vwf,Igfbp7,Pxdn,Emilin1,Npnt,Cspg4
1_Member	GO Molecular Functions	GO:0005201	extracellular matrix structural constituent	-21.8995	26/140	Bgn,Col12a1,Col18a1,Col3a1,Col4a1,Col4a2,Col5a1,Col5a2,Col6a1,Col7a1,Col1a1,Col1a2,Dcn,Ecm1,Eln,Fbln1,Fbln2,Fbn1,Fn1,Hspg2,Nid1,Vwf,Igfbp7,Pxdn,Emilin1,Npnt
1_Member	GO Biological Processes	GO:0030198	extracellular matrix organization	-19.4497	31/273	Bcl3,Serpinh1,Col12a1,Col18a1,Col3a1,Col4a1,Col4a2,Col5a1,Col5a2,Col1a1,Col1a2,Cyp1b1,Eln,Fbln1,Fbln2,Fn1,Hspg2,Lgals3,Lox,Foxc1,Mmp12,Mmp9,Nid1,Ddr2,Tnf,Pxdn,Myo1e,Emilin1,Npnt,Sh3pxd2b,Flrt2
1_Member	GO Molecular Functions	GO:0005198	structural molecule activity	-7.82338	29/661	Bgn,Col12a1,Col18a1,Col3a1,Col4a1,Col4a2,Col5a1,Col5a2,Col6a1,Col7a1,Col1a1,Col1a2,Dcn,Ecm1,Eln,Fbln1,Fbln2,Fbn1,Fn1,Hspg2,Nes,Nid1,Tuba1c,Vwf,Igfbp7,Tubb6,Pxdn,Emilin1,Npnt
1_Member	GO Cellular Components	GO:0005604	basement membrane	-7.76664	12/107	Col18a1,Col4a1,Col4a2,Col5a1,Col7a1,Fbln1,Fbn1,Fn1,Hspg2,Nid1,Thbs2,Npnt
2_Summary	GO Biological Processes	GO:0001944	vasculature development	-14.0445	41/751	Adam12,Adam8,Apoe,C5ar1,Col18a1,Col3a1,Col4a1,Col4a2,Col5a1,Col1a1,Col1a2,Cyp1b1,Dcn,Ecm1,Fn1,Nr4a1,Hspb1,Hspg2,Hyal1,Cxcl10,Igf1,Il1b,Itgax,Anpep,Lgals3,Lox,Foxc1,Mmp9,Pdgfrb,Ptger4,Ptgs2,Ccl12,Thbs2,Xdh,Clic4,Angptl4,Sash1,Myo1e,Emilin1,Cspg4,Apob
2_Member	GO Biological Processes	GO:0001944	vasculature development	-14.0445	41/751	Adam12,Adam8,Apoe,C5ar1,Col18a1,Col3a1,Col4a1,Col4a2,Col5a1,Col1a1,Col1a2,Cyp1b1,Dcn,Ecm1,Fn1,Nr4a1,Hspb1,Hspg2,Hyal1,Cxcl10,Igf1,Il1b,Itgax,Anpep,Lgals3,Lox,Foxc1,Mmp9,Pdgfrb,Ptger4,Ptgs2,Ccl12,Thbs2,Xdh,Clic4,Angptl4,Sash1,Myo1e,Emilin1,Cspg4,Apob
2_Member	GO Biological Processes	GO:0001568	blood vessel development	-13.9704	40/719	Adam12,Adam8,Apoe,C5ar1,Col18a1,Col3a1,Col4a1,Col4a2,Col5a1,Col1a1,Col1a2,Cyp1b1,Dcn,Ecm1,Fn1,Nr4a1,Hspb1,Hspg2,Hyal1,Cxcl10,Il1b,Itgax,Anpep,Lgals3,Lox,Foxc1,Mmp9,Pdgfrb,Ptger4,Ptgs2,Ccl12,Thbs2,Xdh,Clic4,Angptl4,Sash1,Myo1e,Emilin1,Cspg4,Apob
2_Member	GO Biological Processes	GO:0048514	blood vessel morphogenesis	-13.8199	37/622	Adam12,Adam8,Apoe,C5ar1,Col18a1,Col3a1,Col4a1,Col4a2,Cyp1b1,Dcn,Ecm1,Fn1,Nr4a1,Hspb1,Hspg2,Hyal1,Cxcl10,Il1b,Itgax,Anpep,Lgals3,Lox,Foxc1,Mmp9,Pdgfrb,Ptger4,Ptgs2,Ccl12,Thbs2,Xdh,Clic4,Angptl4,Sash1,Myo1e,Emilin1,Cspg4,Apob
2_Member	GO Biological Processes	GO:0072358	cardiovascular system development	-13.7942	41/764	Adam12,Adam8,Apoe,C5ar1,Col18a1,Col3a1,Col4a1,Col4a2,Col5a1,Col1a1,Col1a2,Cyp1b1,Dcn,Ecm1,Fn1,Nr4a1,Hspb1,Hspg2,Hyal1,Cxcl10,Igf1,Il1b,Itgax,Anpep,Lgals3,Lox,Foxc1,Mmp9,Pdgfrb,Ptger4,Ptgs2,Ccl12,Thbs2,Xdh,Clic4,Angptl4,Sash1,Myo1e,Emilin1,Cspg4,Apob
2_Member	GO Biological Processes	GO:0001525	angiogenesis	-11.0596	30/513	Adam12,Adam8,C5ar1,Col18a1,Col4a1,Col4a2,Cyp1b1,Dcn,Ecm1,Fn1,Nr4a1,Hspb1,Hspg2,Hyal1,Cxcl10,Il1b,Itgax,Anpep,Lgals3,Foxc1,Mmp9,Pdgfrb,Ptgs2,Ccl12,Thbs2,Clic4,Angptl4,Sash1,Emilin1,Cspg4
2_Member	GO Biological Processes	GO:1901342	regulation of vasculature development	-7.56339	20/340	Adam12,C5ar1,Col4a2,Cyp1b1,Dcn,Ecm1,Hspb1,Hyal1,Cxcl10,Il1b,Itgax,Lgals3,Foxc1,Mmp9,Ptger4,Ptgs2,Thbs2,Xdh,Sash1,Emilin1
2_Member	GO Biological Processes	GO:0045765	regulation of angiogenesis	-6.83884	18/307	Adam12,C5ar1,Col4a2,Cyp1b1,Dcn,Ecm1,Hspb1,Hyal1,Cxcl10,Il1b,Itgax,Lgals3,Foxc1,Mmp9,Ptgs2,Thbs2,Sash1,Emilin1
2_Member	GO Biological Processes	GO:0045766	positive regulation of angiogenesis	-5.18693	12/185	Adam12,C5ar1,Cyp1b1,Ecm1,Hspb1,Hyal1,Il1b,Itgax,Lgals3,Mmp9,Ptgs2,Sash1
2_Member	GO Biological Processes	GO:1904018	positive regulation of vasculature development	-4.75805	12/204	Adam12,C5ar1,Cyp1b1,Ecm1,Hspb1,Hyal1,Il1b,Itgax,Lgals3,Mmp9,Ptgs2,Sash1
3_Summary	GO Biological Processes	GO:0030155	regulation of cell adhesion	-13.9246	39/686	Adam8,Adam9,Arg1,Bst1,Cd63,Col1a1,Csf1,Cyp1b1,Fbln1,Fbln2,Fgl2,Fn1,Gcnt2,Hsph1,Hsp90aa1,Hyal1,Igf1,Il1b,Il1rn,Il2rg,Lgals1,Lgals3,Mmp12,Nck2,Nid1,Cd244a,Nr4a3,Ddr2,Plxna2,Ptger4,Spp1,Tnf,Cd274,Gpnmb,Emilin1,Npnt,Gsn,Tarm1,Olfm4,Col3a1,Hspg2,Vwf,Axl,Adamts12,Fbn1,Fxyd5,Ptprd,Ezr
3_Member	GO Biological Processes	GO:0030155	regulation of cell adhesion	-13.9246	39/686	Adam8,Adam9,Arg1,Bst1,Cd63,Col1a1,Csf1,Cyp1b1,Fbln1,Fbln2,Fgl2,Fn1,Gcnt2,Hsph1,Hsp90aa1,Hyal1,Igf1,Il1b,Il1rn,Il2rg,Lgals1,Lgals3,Mmp12,Nck2,Nid1,Cd244a,Nr4a3,Ddr2,Plxna2,Ptger4,Spp1,Tnf,Cd274,Gpnmb,Emilin1,Npnt,Gsn,Tarm1,Olfm4
3_Member	GO Biological Processes	GO:0045785	positive regulation of cell adhesion	-10.3557	26/412	Adam8,Adam9,Cd63,Csf1,Fbln1,Fbln2,Fn1,Gcnt2,Hsph1,Hsp90aa1,Hyal1,Igf1,Il1b,Il2rg,Lgals1,Nck2,Nid1,Cd244a,Nr4a3,Ptger4,Spp1,Tnf,Cd274,Emilin1,Npnt,Olfm4
3_Member	GO Biological Processes	GO:0031589	cell-substrate adhesion	-9.85501	23/338	Adam8,Adam9,Bst1,Cd63,Col3a1,Col1a1,Csf1,Fbln1,Fbln2,Fn1,Gcnt2,Hspg2,Lgals1,Mmp12,Nid1,Ddr2,Spp1,Vwf,Axl,Emilin1,Npnt,Adamts12,Olfm4
3_Member	GO Molecular Functions	GO:0005178	integrin binding	-7.83849	13/128	Adam8,Adam9,Col3a1,Fbln1,Fbn1,Fn1,Igf1,Il1b,Spp1,Vwf,Gpnmb,Emilin1,Npnt
3_Member	GO Molecular Functions	GO:0050839	cell adhesion molecule binding	-7.81039	17/235	Adam8,Adam9,Col3a1,Fbln1,Fbn1,Fn1,Igf1,Il1b,Fxyd5,Ptprd,Spp1,Ezr,Vwf,Gpnmb,Emilin1,Npnt,Olfm4
3_Member	GO Biological Processes	GO:0010810	regulation of cell-substrate adhesion	-6.85758	15/211	Bst1,Col1a1,Csf1,Fbln1,Fbln2,Fn1,Gcnt2,Lgals1,Mmp12,Nid1,Ddr2,Spp1,Emilin1,Npnt,Olfm4
3_Member	GO Biological Processes	GO:0007160	cell-matrix adhesion	-5.51101	13/203	Adam8,Adam9,Bst1,Cd63,Col3a1,Csf1,Fn1,Mmp12,Nid1,Ddr2,Emilin1,Npnt,Adamts12
3_Member	GO Biological Processes	GO:0010811	positive regulation of cell-substrate adhesion	-4.32625	9/127	Csf1,Fbln1,Fbln2,Fn1,Nid1,Spp1,Emilin1,Npnt,Olfm4
4_Summary	GO Cellular Components	GO:0005581	collagen trimer	-12.8123	15/81	Col12a1,Col18a1,Col3a1,Col4a1,Col4a2,Col5a1,Col5a2,Col6a1,Col7a1,Col1a1,Col1a2,Dcn,Lox,Msr1,Emilin1,Eln,Fbln1,Fbn1,Serpinh1,Cyp1b1,Foxc1,Ddr2,Pdgfrb,Igf2r,Igfbp5,Il1rn,Il2rg,Igfbp7,Htra3,Anxa5,Nr4a1,Htr2b,Igf1,Il1b,Lpl,Nr4a3,Enpp1,Tnf,Ezr,Tlr2,Atp1a3,Ctsl,Stmn1,Ptgs2,Clic4,Ptger4
4_Member	GO Cellular Components	GO:0005581	collagen trimer	-12.8123	15/81	Col12a1,Col18a1,Col3a1,Col4a1,Col4a2,Col5a1,Col5a2,Col6a1,Col7a1,Col1a1,Col1a2,Dcn,Lox,Msr1,Emilin1
4_Member	GO Molecular Functions	GO:0030020	extracellular matrix structural constituent conferring tensile strength	-11.837	11/38	Col12a1,Col18a1,Col3a1,Col4a1,Col4a2,Col5a1,Col5a2,Col6a1,Col7a1,Col1a1,Col1a2
4_Member	GO Cellular Components	GO:0044420	extracellular matrix component	-11.6769	12/51	Col12a1,Col3a1,Col4a1,Col4a2,Col5a1,Col5a2,Col1a1,Col1a2,Eln,Fbln1,Fbn1,Emilin1
4_Member	GO Biological Processes	GO:0030199	collagen fibril organization	-11.3575	12/54	Serpinh1,Col12a1,Col3a1,Col5a1,Col5a2,Col1a1,Col1a2,Cyp1b1,Lox,Foxc1,Ddr2,Emilin1
4_Member	GO Molecular Functions	GO:0048407	platelet-derived growth factor binding	-10.3271	7/12	Col3a1,Col4a1,Col5a1,Col6a1,Col1a1,Col1a2,Pdgfrb
4_Member	GO Cellular Components	GO:0098644	complex of collagen trimers	-9.18694	7/16	Col3a1,Col4a1,Col4a2,Col5a1,Col5a2,Col1a1,Col1a2
4_Member	GO Molecular Functions	GO:0019838	growth factor binding	-7.11688	13/147	Col3a1,Col4a1,Col5a1,Col6a1,Col1a1,Col1a2,Igf2r,Igfbp5,Il1rn,Il2rg,Pdgfrb,Igfbp7,Htra3
4_Member	GO Cellular Components	GO:0005583	fibrillar collagen trimer	-6.78491	5/11	Col3a1,Col5a1,Col5a2,Col1a1,Col1a2
4_Member	GO Cellular Components	GO:0098643	banded collagen fibril	-6.78491	5/11	Col3a1,Col5a1,Col5a2,Col1a1,Col1a2
4_Member	GO Biological Processes	GO:0071417	cellular response to organonitrogen compound	-3.69868	19/568	Anxa5,Col3a1,Col4a1,Col5a2,Col6a1,Col1a1,Col1a2,Nr4a1,Htr2b,Igf1,Igfbp5,Il1b,Lpl,Nr4a3,Enpp1,Tnf,Ezr,Tlr2,Atp1a3
4_Member	GO Biological Processes	GO:0043588	skin development	-3.35371	12/287	Col3a1,Col5a1,Col5a2,Col1a1,Col1a2,Ctsl,Igfbp5,Stmn1,Foxc1,Ptgs2,Tnf,Clic4
4_Member	GO Biological Processes	GO:1901699	cellular response to nitrogen compound	-3.13772	19/631	Anxa5,Col3a1,Col4a1,Col5a2,Col6a1,Col1a1,Col1a2,Nr4a1,Htr2b,Igf1,Igfbp5,Il1b,Lpl,Nr4a3,Enpp1,Tnf,Ezr,Tlr2,Atp1a3
4_Member	GO Biological Processes	GO:0001101	response to acid chemical	-2.11868	11/355	Col3a1,Col4a1,Col5a2,Col6a1,Col1a1,Col1a2,Igf2r,Lpl,Ptger4,Tnf,Tlr2
4_Member	GO Biological Processes	GO:0071230	cellular response to amino acid stimulus	-2.10592	7/172	Col3a1,Col4a1,Col5a2,Col6a1,Col1a1,Col1a2,Tnf
4_Member	GO Biological Processes	GO:0071229	cellular response to acid chemical	-2.00233	9/271	Col3a1,Col4a1,Col5a2,Col6a1,Col1a1,Col1a2,Lpl,Ptger4,Tnf
5_Summary	GO Biological Processes	GO:0030335	positive regulation of cell migration	-12.7343	33/537	Adam8,Adam9,C5ar1,Ccr1,Col18a1,Col1a1,Csf1,Cyp1b1,Fbln1,Fn1,Gcnt2,Hspb1,Hyal1,Cxcl10,Igf1,Igfbp5,Il1b,Itgax,Lgals3,Mif,Mmp9,Nr4a3,Ddr2,Pdgfrb,Ptger4,Ptgs2,Ccl12,Sema4b,Tlr2,Pla2g7,Cd274,Sash1,Gpnmb,Stmn1,Adora1,Cd5l,Apoe,Bst1,Cst7,Ecm1,Ier3,Il1rn,Acod1,Lpl,Cxcl2,Tnf,Usp18,Axl,Chst2,Chst1,Cspg4,Adamts12,Tarm1,Anxa5,Arg1,Fgl2,Mmp12,Kank2,Htr2b,Ezr,Emilin1,Npnt,Hsph1,Prdx1,Xdh,Bank1,Cdkn2c,Ctsl,Id2,…
5_Member	GO Biological Processes	GO:0030335	positive regulation of cell migration	-12.7343	33/537	Adam8,Adam9,C5ar1,Ccr1,Col18a1,Col1a1,Csf1,Cyp1b1,Fbln1,Fn1,Gcnt2,Hspb1,Hyal1,Cxcl10,Igf1,Igfbp5,Il1b,Itgax,Lgals3,Mif,Mmp9,Nr4a3,Ddr2,Pdgfrb,Ptger4,Ptgs2,Ccl12,Sema4b,Tlr2,Pla2g7,Cd274,Sash1,Gpnmb
5_Member	GO Biological Processes	GO:0051272	positive regulation of cellular component movement	-12.6147	34/576	Adam8,Adam9,C5ar1,Ccr1,Col18a1,Col1a1,Csf1,Cyp1b1,Fbln1,Fn1,Gcnt2,Hspb1,Hyal1,Cxcl10,Igf1,Igfbp5,Il1b,Itgax,Stmn1,Lgals3,Mif,Mmp9,Nr4a3,Ddr2,Pdgfrb,Ptger4,Ptgs2,Ccl12,Sema4b,Tlr2,Pla2g7,Cd274,Sash1,Gpnmb
5_Member	GO Biological Processes	GO:2000147	positive regulation of cell motility	-12.251	33/559	Adam8,Adam9,C5ar1,Ccr1,Col18a1,Col1a1,Csf1,Cyp1b1,Fbln1,Fn1,Gcnt2,Hspb1,Hyal1,Cxcl10,Igf1,Igfbp5,Il1b,Itgax,Lgals3,Mif,Mmp9,Nr4a3,Ddr2,Pdgfrb,Ptger4,Ptgs2,Ccl12,Sema4b,Tlr2,Pla2g7,Cd274,Sash1,Gpnmb
5_Member	GO Biological Processes	GO:0040017	positive regulation of locomotion	-11.5899	33/591	Adam8,Adam9,C5ar1,Ccr1,Col18a1,Col1a1,Csf1,Cyp1b1,Fbln1,Fn1,Gcnt2,Hspb1,Hyal1,Cxcl10,Igf1,Igfbp5,Il1b,Itgax,Lgals3,Mif,Mmp9,Nr4a3,Ddr2,Pdgfrb,Ptger4,Ptgs2,Ccl12,Sema4b,Tlr2,Pla2g7,Cd274,Sash1,Gpnmb
5_Member	GO Biological Processes	GO:0006954	inflammatory response	-10.4442	34/690	Adam8,Adora1,Cd5l,Apoe,Bst1,C5ar1,Ccr1,Csf1,Cst7,Ecm1,Fn1,Hyal1,Ier3,Cxcl10,Igf1,Il1b,Il1rn,Acod1,Lpl,Mif,Ptger4,Ptgs2,Ccl12,Cxcl2,Tnf,Tlr2,Usp18,Axl,Pla2g7,Chst2,Chst1,Cspg4,Adamts12,Tarm1
5_Member	GO Biological Processes	GO:0032101	regulation of response to external stimulus	-9.77164	35/771	Adam8,Adora1,Anxa5,Cd5l,Apoe,Arg1,Bst1,C5ar1,Ccr1,Csf1,Cst7,Fgl2,Fn1,Hspb1,Ier3,Cxcl10,Igf1,Il1b,Acod1,Lpl,Mif,Mmp12,Pdgfrb,Ptger4,Ptgs2,Ccl12,Sema4b,Tnf,Tlr2,Usp18,Pla2g7,Sash1,Kank2,Adamts12,Tarm1
5_Member	GO Biological Processes	GO:0032103	positive regulation of response to external stimulus	-8.16647	20/313	Adam8,Arg1,C5ar1,Ccr1,Csf1,Fn1,Hspb1,Cxcl10,Il1b,Acod1,Lpl,Mif,Pdgfrb,Ptger4,Ptgs2,Tnf,Tlr2,Pla2g7,Sash1,Tarm1
5_Member	GO Biological Processes	GO:0050727	regulation of inflammatory response	-7.23409	20/356	Adam8,Adora1,Cd5l,Apoe,Bst1,C5ar1,Cst7,Ier3,Igf1,Il1b,Acod1,Lpl,Mif,Ptger4,Ptgs2,Tnf,Tlr2,Usp18,Adamts12,Tarm1
5_Member	GO Biological Processes	GO:0070371	ERK1 and ERK2 cascade	-6.41412	18/328	Apoe,C5ar1,Ccr1,Fbln1,Fn1,Gcnt2,Htr2b,Igf1,Il1b,Mif,Pdgfrb,Ptger4,Ccl12,Ezr,Tlr2,Gpnmb,Emilin1,Npnt
5_Member	GO Biological Processes	GO:0043408	regulation of MAPK cascade	-6.22414	28/742	Adam8,Adam9,Adora1,Apoe,C5ar1,Ccr1,Fbln1,Fn1,Gcnt2,Hsph1,Htr2b,Igf1,Il1b,Il1rn,Mif,Prdx1,Pdgfrb,Ccl12,Tnf,Ezr,Xdh,Tlr2,Sash1,Gpnmb,Emilin1,Npnt,Cspg4,Bank1
5_Member	GO Biological Processes	GO:0000165	MAPK cascade	-6.08683	29/799	Adam8,Adam9,Adora1,Apoe,C5ar1,Ccr1,Fbln1,Fn1,Gcnt2,Hsph1,Htr2b,Igf1,Il1b,Il1rn,Mif,Prdx1,Pdgfrb,Ptger4,Ccl12,Tnf,Ezr,Xdh,Tlr2,Sash1,Gpnmb,Emilin1,Npnt,Cspg4,Bank1
5_Member	GO Biological Processes	GO:0070372	regulation of ERK1 and ERK2 cascade	-6.0643	17/311	Apoe,C5ar1,Ccr1,Fbln1,Fn1,Gcnt2,Htr2b,Igf1,Il1b,Mif,Pdgfrb,Ccl12,Ezr,Tlr2,Gpnmb,Emilin1,Npnt
5_Member	GO Biological Processes	GO:0008285	negative regulation of cell proliferation	-5.91693	26/680	Adora1,Apoe,Arg1,Cdkn2c,Ctsl,Cyp1b1,Fbln1,Id2,Igf1,Igfbp5,Il1b,Lgals3,Mmp9,Ptgs2,Ccl12,Slfn2,Tfdp1,Tnf,Xdh,Tlr2,Cd274,Ifi30,Ifitm3,Gpnmb,Kank2,Tarm1
5_Member	GO Biological Processes	GO:0043410	positive regulation of MAPK cascade	-5.78538	22/520	Adam8,Adam9,Adora1,Apoe,C5ar1,Ccr1,Gcnt2,Htr2b,Igf1,Il1b,Il1rn,Mif,Pdgfrb,Ccl12,Tnf,Xdh,Tlr2,Sash1,Gpnmb,Npnt,Cspg4,Bank1
5_Member	GO Biological Processes	GO:0070374	positive regulation of ERK1 and ERK2 cascade	-4.4152	12/221	Apoe,C5ar1,Ccr1,Gcnt2,Htr2b,Il1b,Mif,Pdgfrb,Ccl12,Tlr2,Gpnmb,Npnt
5_Member	GO Biological Processes	GO:0043269	regulation of ion transport	-2.41503	19/731	Adora1,Apoe,Arg1,Cd63,Ccr1,Fabp3,Cxcl10,Igf1,Il1b,Il1rn,Lgals3,Mif,Mmp9,Fxyd5,Pdgfrb,Ptgs2,Ccl12,Tnf,Clic4
6_Summary	GO Biological Processes	GO:0031347	regulation of defense response	-12.0398	35/639	Adam8,Adora1,Cd5l,Apoe,Arg1,Bst1,C5ar1,Ccr1,Cst7,Fgl2,Ier3,Ifi204,Igf1,Il1b,Acod1,Lpl,Mif,Mmp12,Ptger4,Ptgs2,Tnf,Tlr2,Usp18,Irf7,Ikbke,Rsad2,Zbp1,Rftn1,Rab7b,Adamts12,Tarm1,Cd300lf,B430306N03Rik,Treml2,Nlrc5,C4b,Ctsg,Cfb,Lgals3,Nr4a3,Ezr,Cd274,Cyp1b1,Id2,Ddr2,Enpp1,Bhlhe40
6_Member	GO Biological Processes	GO:0031347	regulation of defense response	-12.0398	35/639	Adam8,Adora1,Cd5l,Apoe,Arg1,Bst1,C5ar1,Ccr1,Cst7,Fgl2,Ier3,Ifi204,Igf1,Il1b,Acod1,Lpl,Mif,Mmp12,Ptger4,Ptgs2,Tnf,Tlr2,Usp18,Irf7,Ikbke,Rsad2,Zbp1,Rftn1,Rab7b,Adamts12,Tarm1,Cd300lf,B430306N03Rik,Treml2,Nlrc5
6_Member	GO Biological Processes	GO:0045088	regulation of innate immune response	-8.08272	19/285	Adam8,Apoe,Arg1,Ccr1,Ifi204,Acod1,Mmp12,Tnf,Tlr2,Irf7,Ikbke,Rsad2,Zbp1,Rftn1,Rab7b,Cd300lf,B430306N03Rik,Treml2,Nlrc5
6_Member	GO Biological Processes	GO:0031349	positive regulation of defense response	-7.62636	21/371	Adam8,Arg1,Ifi204,Il1b,Acod1,Lpl,Mif,Mmp12,Ptger4,Ptgs2,Tnf,Tlr2,Irf7,Ikbke,Rsad2,Zbp1,Rftn1,Rab7b,Tarm1,Cd300lf,Nlrc5
6_Member	GO Biological Processes	GO:0045089	positive regulation of innate immune response	-5.58747	14/232	Adam8,Ifi204,Acod1,Mmp12,Tnf,Tlr2,Irf7,Ikbke,Rsad2,Zbp1,Rftn1,Rab7b,Cd300lf,Nlrc5
6_Member	GO Biological Processes	GO:0050778	positive regulation of immune response	-4.71001	25/747	Adam8,Cd5l,C4b,C5ar1,Ctsg,Cfb,Ifi204,Il1b,Acod1,Lgals3,Mif,Mmp12,Nr4a3,Tnf,Ezr,Tlr2,Irf7,Ikbke,Rsad2,Zbp1,Cd274,Rftn1,Rab7b,Cd300lf,Nlrc5
6_Member	GO Biological Processes	GO:0002224	toll-like receptor signaling pathway	-4.18591	8/103	Acod1,Tnf,Tlr2,Irf7,Rsad2,Rftn1,Rab7b,Cd300lf
6_Member	GO Biological Processes	GO:0034121	regulation of toll-like receptor signaling pathway	-3.7512	6/63	Acod1,Tlr2,Irf7,Rsad2,Rab7b,Cd300lf
6_Member	GO Biological Processes	GO:0002218	activation of innate immune response	-3.48062	9/164	Ifi204,Acod1,Tnf,Tlr2,Irf7,Rsad2,Rftn1,Rab7b,Cd300lf
6_Member	GO Biological Processes	GO:0002221	pattern recognition receptor signaling pathway	-3.33048	8/137	Acod1,Tnf,Tlr2,Irf7,Rsad2,Rftn1,Rab7b,Cd300lf
6_Member	GO Biological Processes	GO:0002758	innate immune response-activating signal transduction	-3.28856	8/139	Acod1,Tnf,Tlr2,Irf7,Rsad2,Rftn1,Rab7b,Cd300lf
6_Member	GO Biological Processes	GO:0002253	activation of immune response	-3.19683	17/526	Cd5l,C4b,C5ar1,Cfb,Ifi204,Il1b,Acod1,Lgals3,Nr4a3,Tnf,Ezr,Tlr2,Irf7,Rsad2,Rftn1,Rab7b,Cd300lf
6_Member	GO Biological Processes	GO:0002755	MyD88-dependent toll-like receptor signaling pathway	-2.66307	3/20	Tlr2,Irf7,Cd300lf
6_Member	GO Biological Processes	GO:0051090	regulation of DNA-binding transcription factor activity	-2.19137	12/396	Adam8,Cyp1b1,Id2,Il1b,Acod1,Ddr2,Enpp1,Bhlhe40,Tnf,Tlr2,Rab7b,Nlrc5
7_Summary	GO Biological Processes	GO:0002683	negative regulation of immune system process	-11.2677	29/470	Adora1,Arg1,Ccr1,Col3a1,Cst7,Fbn1,Fgl2,Id2,Igf1,Acod1,Lgals3,Mif,Mmp12,Pdcd1,Ptger4,Ccl12,Tnf,Ezr,Axl,Cd274,Gpnmb,Emilin1,Rab7b,Bank1,Tarm1,Cd300lf,Milr1,Olfm4,Nlrc5,Adam8,Apoe,Bst1,C5ar1,Hsph1,Hsp90aa1,Il1b,Il2rg,Lgals1,Nck2,Cd244a,Nr4a3,Pdgfrb,Gsn,Gcnt2,Il1rn,Bcl3,Itgax,Rsad2,Treml2,Col1a1,Cyp1b1,Fbln1,Plxna2,Ptprd,Slc7a11,Rap2b,Npnt,Csf1
7_Member	GO Biological Processes	GO:0002683	negative regulation of immune system process	-11.2677	29/470	Adora1,Arg1,Ccr1,Col3a1,Cst7,Fbn1,Fgl2,Id2,Igf1,Acod1,Lgals3,Mif,Mmp12,Pdcd1,Ptger4,Ccl12,Tnf,Ezr,Axl,Cd274,Gpnmb,Emilin1,Rab7b,Bank1,Tarm1,Cd300lf,Milr1,Olfm4,Nlrc5
7_Member	GO Biological Processes	GO:0050865	regulation of cell activation	-7.29665	29/699	Adam8,Apoe,Arg1,Bst1,C5ar1,Cst7,Fgl2,Hsph1,Hsp90aa1,Id2,Igf1,Il1b,Il2rg,Lgals1,Lgals3,Mif,Nck2,Cd244a,Nr4a3,Pdgfrb,Axl,Cd274,Gpnmb,Emilin1,Gsn,Bank1,Tarm1,Cd300lf,Milr1
7_Member	GO Biological Processes	GO:1903037	regulation of leukocyte cell-cell adhesion	-6.55161	17/287	Adam8,Arg1,Fgl2,Hsph1,Hsp90aa1,Igf1,Il1b,Il2rg,Lgals1,Lgals3,Nck2,Cd244a,Nr4a3,Tnf,Cd274,Gpnmb,Tarm1
7_Member	GO Biological Processes	GO:0050866	negative regulation of cell activation	-6.27778	14/203	Apoe,Arg1,Cst7,Fgl2,Id2,Lgals3,Axl,Cd274,Gpnmb,Emilin1,Bank1,Tarm1,Cd300lf,Milr1
7_Member	GO Biological Processes	GO:0002694	regulation of leukocyte activation	-6.18358	26/658	Adam8,Arg1,Bst1,C5ar1,Cst7,Fgl2,Hsph1,Hsp90aa1,Id2,Igf1,Il1b,Il2rg,Lgals1,Lgals3,Mif,Nck2,Cd244a,Nr4a3,Axl,Cd274,Gpnmb,Gsn,Bank1,Tarm1,Cd300lf,Milr1
7_Member	GO Biological Processes	GO:0007159	leukocyte cell-cell adhesion	-5.91255	17/319	Adam8,Arg1,Fgl2,Hsph1,Hsp90aa1,Igf1,Il1b,Il2rg,Lgals1,Lgals3,Nck2,Cd244a,Nr4a3,Tnf,Cd274,Gpnmb,Tarm1
7_Member	GO Biological Processes	GO:0022407	regulation of cell-cell adhesion	-5.89045	19/394	Adam8,Arg1,Fgl2,Gcnt2,Hsph1,Hsp90aa1,Igf1,Il1b,Il1rn,Il2rg,Lgals1,Lgals3,Nck2,Cd244a,Nr4a3,Tnf,Cd274,Gpnmb,Tarm1
7_Member	GO Biological Processes	GO:0042110	T cell activation	-5.56423	21/495	Adam8,Arg1,Bcl3,Fgl2,Hsph1,Hsp90aa1,Igf1,Il1b,Il2rg,Itgax,Lgals1,Lgals3,Nck2,Cd244a,Ptger4,Rsad2,Cd274,Gpnmb,Gsn,Tarm1,Treml2
7_Member	GO Biological Processes	GO:0050863	regulation of T cell activation	-5.47259	16/307	Adam8,Arg1,Fgl2,Hsph1,Hsp90aa1,Igf1,Il1b,Il2rg,Lgals1,Lgals3,Nck2,Cd244a,Cd274,Gpnmb,Gsn,Tarm1
7_Member	GO Biological Processes	GO:0002695	negative regulation of leukocyte activation	-5.25969	12/182	Arg1,Cst7,Fgl2,Id2,Lgals3,Axl,Cd274,Gpnmb,Bank1,Tarm1,Cd300lf,Milr1
7_Member	GO Biological Processes	GO:0007162	negative regulation of cell adhesion	-5.25326	15/283	Adam8,Arg1,Col1a1,Cyp1b1,Fbln1,Fgl2,Gcnt2,Il1rn,Lgals1,Lgals3,Mmp12,Plxna2,Cd274,Gpnmb,Tarm1
7_Member	GO Biological Processes	GO:0098609	cell-cell adhesion	-4.94825	25/723	Adam8,Arg1,Cyp1b1,Fgl2,Gcnt2,Hsph1,Hsp90aa1,Igf1,Il1b,Il1rn,Il2rg,Itgax,Lgals1,Lgals3,Nck2,Cd244a,Nr4a3,Ptprd,Tnf,Slc7a11,Cd274,Rap2b,Gpnmb,Npnt,Tarm1
7_Member	GO Biological Processes	GO:1903039	positive regulation of leukocyte cell-cell adhesion	-4.77935	12/203	Adam8,Hsph1,Hsp90aa1,Igf1,Il1b,Il2rg,Lgals1,Nck2,Cd244a,Nr4a3,Tnf,Cd274
7_Member	GO Biological Processes	GO:0051249	regulation of lymphocyte activation	-4.77121	21/558	Adam8,Arg1,Bst1,Fgl2,Hsph1,Hsp90aa1,Id2,Igf1,Il1b,Il2rg,Lgals1,Lgals3,Mif,Nck2,Cd244a,Axl,Cd274,Gpnmb,Gsn,Bank1,Tarm1
7_Member	GO Biological Processes	GO:0070663	regulation of leukocyte proliferation	-4.76423	13/238	Arg1,Bst1,Csf1,Igf1,Il1b,Lgals3,Mif,Nck2,Cd244a,Ccl12,Cd274,Gpnmb,Tarm1
7_Member	GO Biological Processes	GO:0022409	positive regulation of cell-cell adhesion	-4.68788	13/242	Adam8,Gcnt2,Hsph1,Hsp90aa1,Igf1,Il1b,Il2rg,Lgals1,Nck2,Cd244a,Nr4a3,Tnf,Cd274
7_Member	GO Biological Processes	GO:0032944	regulation of mononuclear cell proliferation	-4.3022	12/227	Arg1,Bst1,Csf1,Igf1,Il1b,Lgals3,Mif,Nck2,Cd244a,Cd274,Gpnmb,Tarm1
7_Member	GO Biological Processes	GO:0070661	leukocyte proliferation	-3.88852	14/330	Arg1,Bst1,Csf1,Igf1,Il1b,Itgax,Lgals3,Mif,Nck2,Cd244a,Ccl12,Cd274,Gpnmb,Tarm1
7_Member	GO Biological Processes	GO:0051250	negative regulation of lymphocyte activation	-3.72627	9/152	Arg1,Fgl2,Id2,Lgals3,Axl,Cd274,Gpnmb,Bank1,Tarm1
7_Member	GO Biological Processes	GO:0050870	positive regulation of T cell activation	-3.71644	10/187	Adam8,Hsph1,Hsp90aa1,Igf1,Il1b,Il2rg,Lgals1,Nck2,Cd244a,Cd274
7_Member	GO Biological Processes	GO:0050670	regulation of lymphocyte proliferation	-3.69157	11/225	Arg1,Bst1,Igf1,Il1b,Lgals3,Mif,Nck2,Cd244a,Cd274,Gpnmb,Tarm1
7_Member	GO Biological Processes	GO:0032943	mononuclear cell proliferation	-3.60075	13/310	Arg1,Bst1,Csf1,Igf1,Il1b,Itgax,Lgals3,Mif,Nck2,Cd244a,Cd274,Gpnmb,Tarm1
7_Member	GO Biological Processes	GO:0042098	T cell proliferation	-3.38052	10/206	Arg1,Igf1,Il1b,Itgax,Lgals3,Nck2,Cd244a,Cd274,Gpnmb,Tarm1
7_Member	GO Biological Processes	GO:0042129	regulation of T cell proliferation	-3.36624	9/170	Arg1,Igf1,Il1b,Lgals3,Nck2,Cd244a,Cd274,Gpnmb,Tarm1
7_Member	GO Biological Processes	GO:0032946	positive regulation of mononuclear cell proliferation	-3.30942	8/138	Bst1,Csf1,Igf1,Il1b,Mif,Nck2,Cd244a,Cd274
7_Member	GO Biological Processes	GO:0070665	positive regulation of leukocyte proliferation	-3.16723	8/145	Bst1,Csf1,Igf1,Il1b,Mif,Nck2,Cd244a,Cd274
7_Member	GO Biological Processes	GO:0046651	lymphocyte proliferation	-3.08377	12/308	Arg1,Bst1,Igf1,Il1b,Itgax,Lgals3,Mif,Nck2,Cd244a,Cd274,Gpnmb,Tarm1
7_Member	GO Biological Processes	GO:0050867	positive regulation of cell activation	-2.89268	15/463	Adam8,Bst1,Hsph1,Hsp90aa1,Igf1,Il1b,Il2rg,Lgals1,Mif,Nck2,Cd244a,Nr4a3,Pdgfrb,Axl,Cd274
7_Member	GO Biological Processes	GO:1903038	negative regulation of leukocyte cell-cell adhesion	-2.75496	7/131	Adam8,Arg1,Fgl2,Lgals3,Cd274,Gpnmb,Tarm1
7_Member	GO Biological Processes	GO:0050671	positive regulation of lymphocyte proliferation	-2.66242	7/136	Bst1,Igf1,Il1b,Mif,Nck2,Cd244a,Cd274
7_Member	GO Biological Processes	GO:0051251	positive regulation of lymphocyte activation	-2.64467	13/394	Adam8,Bst1,Hsph1,Hsp90aa1,Igf1,Il1b,Il2rg,Lgals1,Mif,Nck2,Cd244a,Axl,Cd274
7_Member	GO Biological Processes	GO:0002696	positive regulation of leukocyte activation	-2.59174	14/448	Adam8,Bst1,Hsph1,Hsp90aa1,Igf1,Il1b,Il2rg,Lgals1,Mif,Nck2,Cd244a,Nr4a3,Axl,Cd274
7_Member	GO Biological Processes	GO:0022408	negative regulation of cell-cell adhesion	-2.48213	8/186	Adam8,Arg1,Fgl2,Il1rn,Lgals3,Cd274,Gpnmb,Tarm1
7_Member	GO Biological Processes	GO:0050868	negative regulation of T cell activation	-2.30768	6/119	Arg1,Fgl2,Lgals3,Cd274,Gpnmb,Tarm1
7_Member	GO Biological Processes	GO:0070664	negative regulation of leukocyte proliferation	-2.21355	5/88	Arg1,Ccl12,Cd274,Gpnmb,Tarm1
7_Member	GO Biological Processes	GO:0042102	positive regulation of T cell proliferation	-2.02035	5/98	Igf1,Il1b,Nck2,Cd244a,Cd274
8_Summary	GO Biological Processes	GO:0001503	ossification	-10.2853	25/383	Ccr1,Col1a1,Col1a2,Csf1,Ecm1,Hspg2,Id2,Ifi204,Igf1,Igfbp5,Lox,Foxc1,Mgp,Mmp9,Ddr2,Enpp1,Ptger4,Ptgs2,Spp1,Tnf,Rsad2,Pdlim7,Fam20c,Npnt,Sh3pxd2b
8_Member	GO Biological Processes	GO:0001503	ossification	-10.2853	25/383	Ccr1,Col1a1,Col1a2,Csf1,Ecm1,Hspg2,Id2,Ifi204,Igf1,Igfbp5,Lox,Foxc1,Mgp,Mmp9,Ddr2,Enpp1,Ptger4,Ptgs2,Spp1,Tnf,Rsad2,Pdlim7,Fam20c,Npnt,Sh3pxd2b
8_Member	GO Biological Processes	GO:0030278	regulation of ossification	-7.06904	16/233	Ccr1,Csf1,Ecm1,Id2,Ifi204,Igf1,Igfbp5,Mgp,Ddr2,Enpp1,Ptger4,Tnf,Rsad2,Pdlim7,Fam20c,Npnt
8_Member	GO Biological Processes	GO:0001649	osteoblast differentiation	-6.32986	14/201	Col1a1,Id2,Ifi204,Igf1,Igfbp5,Lox,Ddr2,Ptger4,Spp1,Tnf,Pdlim7,Fam20c,Npnt,Sh3pxd2b
8_Member	GO Biological Processes	GO:0045667	regulation of osteoblast differentiation	-4.7225	10/142	Id2,Ifi204,Igf1,Igfbp5,Ddr2,Ptger4,Tnf,Pdlim7,Fam20c,Npnt
8_Member	GO Biological Processes	GO:0045669	positive regulation of osteoblast differentiation	-4.51214	7/68	Ifi204,Igf1,Ddr2,Ptger4,Pdlim7,Fam20c,Npnt
8_Member	GO Biological Processes	GO:0045778	positive regulation of ossification	-3.44916	7/100	Ifi204,Igf1,Ddr2,Ptger4,Pdlim7,Fam20c,Npnt
9_Summary	GO Biological Processes	GO:0009615	response to virus	-10.1071	21/270	Bcl3,Fgl2,Hyal1,Cxcl10,Ifit2,Ifit3,Il1b,Itgax,Mmp12,Mx1,Tnf,Oasl2,Irf7,Ikbke,Rsad2,Zbp1,Ifitm3,Rtp4,Ifi27l2a,Slfn9,Oas2,Arg1,C5ar1,Ctsg,Mpo,Tlr2
9_Member	GO Biological Processes	GO:0009615	response to virus	-10.1071	21/270	Bcl3,Fgl2,Hyal1,Cxcl10,Ifit2,Ifit3,Il1b,Itgax,Mmp12,Mx1,Tnf,Oasl2,Irf7,Ikbke,Rsad2,Zbp1,Ifitm3,Rtp4,Ifi27l2a,Slfn9,Oas2
9_Member	GO Biological Processes	GO:0051607	defense response to virus	-7.22599	16/227	Fgl2,Cxcl10,Ifit2,Ifit3,Il1b,Itgax,Mmp12,Mx1,Oasl2,Irf7,Rsad2,Zbp1,Ifitm3,Rtp4,Slfn9,Oas2
9_Member	GO Biological Processes	GO:0098542	defense response to other organism	-4.59322	23/665	Arg1,Bcl3,C5ar1,Ctsg,Fgl2,Cxcl10,Ifit2,Ifit3,Il1b,Itgax,Mmp12,Mpo,Mx1,Tnf,Oasl2,Tlr2,Irf7,Rsad2,Zbp1,Ifitm3,Rtp4,Slfn9,Oas2
10_Summary	GO Biological Processes	GO:0001817	regulation of cytokine production	-9.39176	32/677	Adam8,Arg1,Bcl3,C5ar1,Cyp1b1,Fbln1,Fn1,Hspb1,Htr2b,Ifi204,Igf1,Il1b,Il1rn,Acod1,Lpl,Mif,Mmp12,Cd244a,Nr4a3,Ptger4,Ptgs2,Tnf,Ezr,Tlr2,Axl,Irf7,Rsad2,Cd274,Gpnmb,Rab7b,Bank1,Tarm1,Rftn1,Adora1,Anxa5,Apoe,Ier3,Fabp5,Anpep,Lgals3,Mmp9,Enpp1,Bag3,Cd300lf,Adam9,Hcar2,Ildr2,Hsph1,Slc7a11,Spp1
10_Member	GO Biological Processes	GO:0001817	regulation of cytokine production	-9.39176	32/677	Adam8,Arg1,Bcl3,C5ar1,Cyp1b1,Fbln1,Fn1,Hspb1,Htr2b,Ifi204,Igf1,Il1b,Il1rn,Acod1,Lpl,Mif,Mmp12,Cd244a,Nr4a3,Ptger4,Ptgs2,Tnf,Ezr,Tlr2,Axl,Irf7,Rsad2,Cd274,Gpnmb,Rab7b,Bank1,Tarm1
10_Member	GO Biological Processes	GO:0001816	cytokine production	-8.8428	33/753	Adam8,Arg1,Bcl3,C5ar1,Cyp1b1,Fbln1,Fn1,Hspb1,Htr2b,Ifi204,Igf1,Il1b,Il1rn,Acod1,Lpl,Mif,Mmp12,Cd244a,Nr4a3,Ptger4,Ptgs2,Tnf,Ezr,Tlr2,Axl,Irf7,Rsad2,Cd274,Rftn1,Gpnmb,Rab7b,Bank1,Tarm1
10_Member	GO Biological Processes	GO:0001819	positive regulation of cytokine production	-7.55201	23/446	Adam8,Bcl3,C5ar1,Cyp1b1,Hspb1,Htr2b,Ifi204,Il1b,Il1rn,Lpl,Mif,Mmp12,Cd244a,Nr4a3,Ptger4,Ptgs2,Tnf,Tlr2,Irf7,Rsad2,Cd274,Rab7b,Tarm1
10_Member	GO Biological Processes	GO:0050707	regulation of cytokine secretion	-6.051	14/212	Fbln1,Fn1,Htr2b,Il1b,Lpl,Mif,Mmp12,Cd244a,Ptger4,Tnf,Ezr,Tlr2,Cd274,Bank1
10_Member	GO Biological Processes	GO:0051051	negative regulation of transport	-5.61083	22/533	Adora1,Anxa5,Apoe,Fbln1,Fn1,Ier3,Il1b,Il1rn,Fabp5,Anpep,Lgals3,Mmp9,Enpp1,Ptger4,Ptgs2,Tnf,Ezr,Tlr2,Bag3,Rsad2,Bank1,Cd300lf
10_Member	GO Biological Processes	GO:0050663	cytokine secretion	-5.35352	14/243	Fbln1,Fn1,Htr2b,Il1b,Lpl,Mif,Mmp12,Cd244a,Ptger4,Tnf,Ezr,Tlr2,Cd274,Bank1
10_Member	GO Biological Processes	GO:0002791	regulation of peptide secretion	-5.14444	21/527	Adam9,Adora1,Anxa5,Apoe,Fbln1,Fn1,Htr2b,Igf1,Il1b,Lpl,Mif,Mmp12,Cd244a,Ptger4,Tnf,Ezr,Tlr2,Rsad2,Cd274,Hcar2,Bank1
10_Member	GO Biological Processes	GO:0050708	regulation of protein secretion	-5.10219	20/488	Adam9,Anxa5,Apoe,Fbln1,Fn1,Htr2b,Igf1,Il1b,Lpl,Mif,Mmp12,Cd244a,Ptger4,Tnf,Ezr,Tlr2,Rsad2,Cd274,Hcar2,Bank1
10_Member	GO Biological Processes	GO:0002790	peptide secretion	-4.7697	23/648	Adam9,Adora1,Anxa5,Apoe,Fbln1,Fn1,Htr2b,Igf1,Il1b,Il1rn,Lpl,Mif,Mmp12,Cd244a,Ptger4,Tnf,Ezr,Tlr2,Rsad2,Cd274,Hcar2,Bank1,Ildr2
10_Member	GO Biological Processes	GO:0009306	protein secretion	-4.76605	22/603	Adam9,Anxa5,Apoe,Fbln1,Fn1,Htr2b,Igf1,Il1b,Il1rn,Lpl,Mif,Mmp12,Cd244a,Ptger4,Tnf,Ezr,Tlr2,Rsad2,Cd274,Hcar2,Bank1,Ildr2
10_Member	GO Biological Processes	GO:1904950	negative regulation of establishment of protein localization	-4.67417	12/208	Anxa5,Apoe,Fbln1,Fn1,Hsph1,Il1b,Ptger4,Tnf,Ezr,Bag3,Rsad2,Bank1
10_Member	GO Biological Processes	GO:0050715	positive regulation of cytokine secretion	-4.54165	10/149	Htr2b,Il1b,Lpl,Mif,Mmp12,Cd244a,Ptger4,Tnf,Tlr2,Cd274
10_Member	GO Biological Processes	GO:0002793	positive regulation of peptide secretion	-4.48208	15/329	Adam9,Adora1,Htr2b,Igf1,Il1b,Lpl,Mif,Mmp12,Cd244a,Ptger4,Tnf,Ezr,Tlr2,Cd274,Hcar2
10_Member	GO Biological Processes	GO:0050709	negative regulation of protein secretion	-4.46732	10/152	Anxa5,Apoe,Fbln1,Fn1,Il1b,Ptger4,Tnf,Ezr,Rsad2,Bank1
10_Member	GO Biological Processes	GO:0070201	regulation of establishment of protein localization	-4.35276	24/737	Adam9,Anxa5,Apoe,Fbln1,Fn1,Hsph1,Htr2b,Igf1,Il1b,Lpl,Mif,Mmp12,Cd244a,Ptger4,Ptgs2,Tnf,Ezr,Tlr2,Slc7a11,Bag3,Rsad2,Cd274,Hcar2,Bank1
10_Member	GO Biological Processes	GO:0051048	negative regulation of secretion	-4.34646	13/261	Adora1,Anxa5,Apoe,Fbln1,Fn1,Il1b,Il1rn,Anpep,Ptger4,Tnf,Ezr,Rsad2,Bank1
10_Member	GO Biological Processes	GO:0050714	positive regulation of protein secretion	-4.32877	14/300	Adam9,Htr2b,Igf1,Il1b,Lpl,Mif,Mmp12,Cd244a,Ptger4,Tnf,Ezr,Tlr2,Cd274,Hcar2
10_Member	GO Biological Processes	GO:0090087	regulation of peptide transport	-4.27011	24/746	Adam9,Adora1,Anxa5,Apoe,Fbln1,Fn1,Htr2b,Igf1,Il1b,Lpl,Mif,Mmp12,Cd244a,Ptger4,Ptgs2,Tnf,Ezr,Tlr2,Slc7a11,Bag3,Rsad2,Cd274,Hcar2,Bank1
10_Member	GO Biological Processes	GO:0002792	negative regulation of peptide secretion	-4.23214	10/162	Anxa5,Apoe,Fbln1,Fn1,Il1b,Ptger4,Tnf,Ezr,Rsad2,Bank1
10_Member	GO Biological Processes	GO:1903531	negative regulation of secretion by cell	-4.21097	12/232	Adora1,Anxa5,Apoe,Fbln1,Fn1,Il1b,Il1rn,Ptger4,Tnf,Ezr,Rsad2,Bank1
10_Member	GO Biological Processes	GO:0051223	regulation of protein transport	-4.20405	23/705	Adam9,Anxa5,Apoe,Fbln1,Fn1,Htr2b,Igf1,Il1b,Lpl,Mif,Mmp12,Cd244a,Ptger4,Ptgs2,Tnf,Ezr,Tlr2,Slc7a11,Bag3,Rsad2,Cd274,Hcar2,Bank1
10_Member	GO Biological Processes	GO:0051224	negative regulation of protein transport	-4.08508	11/203	Anxa5,Apoe,Fbln1,Fn1,Il1b,Ptger4,Tnf,Ezr,Bag3,Rsad2,Bank1
10_Member	GO Biological Processes	GO:0051222	positive regulation of protein transport	-3.67159	16/433	Adam9,Htr2b,Igf1,Il1b,Lpl,Mif,Mmp12,Cd244a,Ptger4,Ptgs2,Tnf,Ezr,Tlr2,Bag3,Cd274,Hcar2
10_Member	GO Biological Processes	GO:0050710	negative regulation of cytokine secretion	-3.60328	6/67	Fbln1,Fn1,Ptger4,Tnf,Ezr,Bank1
10_Member	GO Biological Processes	GO:1904951	positive regulation of establishment of protein localization	-3.46425	16/452	Adam9,Htr2b,Igf1,Il1b,Lpl,Mif,Mmp12,Cd244a,Ptger4,Ptgs2,Tnf,Ezr,Tlr2,Bag3,Cd274,Hcar2
10_Member	GO Biological Processes	GO:1903532	positive regulation of secretion by cell	-3.25965	16/472	Adam9,Htr2b,Igf1,Il1b,Lgals3,Lpl,Mif,Mmp12,Cd244a,Ptger4,Spp1,Tnf,Ezr,Tlr2,Cd274,Hcar2
10_Member	GO Biological Processes	GO:0051047	positive regulation of secretion	-3.18766	17/527	Adam9,Adora1,Htr2b,Igf1,Il1b,Lgals3,Lpl,Mif,Mmp12,Cd244a,Ptger4,Spp1,Tnf,Ezr,Tlr2,Cd274,Hcar2
11_Summary	GO Biological Processes	GO:0097435	supramolecular fiber organization	-9.34393	32/680	Apoe,Capg,Serpinh1,Cit,Col12a1,Col3a1,Col5a1,Col5a2,Col1a1,Col1a2,Cyp1b1,Eln,Gpr65,Stmn1,Lox,Foxc1,Nck2,Nrap,Ddr2,Pdgfrb,Ptger4,Dpysl3,Ezr,Tlr2,Kif18b,Emilin1,Cald1,Baiap2l2,Gsn,Kank2,Sh3pxd2b,Tpm4,Adora1,Bst1,Ctsl,Tnf,Pdlim7,Flnc,Inf2,Kif23,Gas2l3,Hsph1,Hspa1b,Nek2,Hspa1a,Fn1,Hsp90aa1,Htr2b,Ptgs2,Sema4b
11_Member	GO Biological Processes	GO:0097435	supramolecular fiber organization	-9.34393	32/680	Apoe,Capg,Serpinh1,Cit,Col12a1,Col3a1,Col5a1,Col5a2,Col1a1,Col1a2,Cyp1b1,Eln,Gpr65,Stmn1,Lox,Foxc1,Nck2,Nrap,Ddr2,Pdgfrb,Ptger4,Dpysl3,Ezr,Tlr2,Kif18b,Emilin1,Cald1,Baiap2l2,Gsn,Kank2,Sh3pxd2b,Tpm4
11_Member	GO Biological Processes	GO:0030029	actin filament-based process	-5.70693	27/743	Adora1,Bst1,Capg,Cit,Ctsl,Eln,Gpr65,Stmn1,Nck2,Nrap,Pdgfrb,Ptger4,Tnf,Dpysl3,Ezr,Tlr2,Pdlim7,Flnc,Inf2,Kif23,Cald1,Baiap2l2,Gsn,Kank2,Gas2l3,Sh3pxd2b,Tpm4
11_Member	GO Biological Processes	GO:0030036	actin cytoskeleton organization	-5.62335	25/661	Bst1,Capg,Cit,Ctsl,Eln,Gpr65,Stmn1,Nck2,Nrap,Pdgfrb,Ptger4,Tnf,Dpysl3,Ezr,Tlr2,Pdlim7,Inf2,Kif23,Cald1,Baiap2l2,Gsn,Kank2,Gas2l3,Sh3pxd2b,Tpm4
11_Member	GO Biological Processes	GO:0007015	actin filament organization	-4.57413	17/403	Capg,Cit,Eln,Gpr65,Stmn1,Nck2,Nrap,Ptger4,Dpysl3,Ezr,Tlr2,Cald1,Baiap2l2,Gsn,Kank2,Sh3pxd2b,Tpm4
11_Member	GO Biological Processes	GO:0032956	regulation of actin cytoskeleton organization	-4.26142	15/344	Bst1,Capg,Cit,Ctsl,Eln,Gpr65,Stmn1,Nck2,Pdgfrb,Ptger4,Tlr2,Baiap2l2,Gsn,Kank2,Sh3pxd2b
11_Member	GO Biological Processes	GO:0032970	regulation of actin filament-based process	-4.18088	16/391	Adora1,Bst1,Capg,Cit,Ctsl,Eln,Gpr65,Stmn1,Nck2,Pdgfrb,Ptger4,Tlr2,Baiap2l2,Gsn,Kank2,Sh3pxd2b
11_Member	GO Biological Processes	GO:0051017	actin filament bundle assembly	-4.07806	10/169	Eln,Gpr65,Stmn1,Ptger4,Dpysl3,Ezr,Cald1,Baiap2l2,Kank2,Sh3pxd2b
11_Member	GO Biological Processes	GO:0051493	regulation of cytoskeleton organization	-4.02235	19/536	Bst1,Capg,Cit,Ctsl,Eln,Gpr65,Hsph1,Hspa1b,Stmn1,Nck2,Nek2,Pdgfrb,Ptger4,Tlr2,Hspa1a,Baiap2l2,Gsn,Kank2,Sh3pxd2b
11_Member	GO Biological Processes	GO:0061572	actin filament bundle organization	-4.01447	10/172	Eln,Gpr65,Stmn1,Ptger4,Dpysl3,Ezr,Cald1,Baiap2l2,Kank2,Sh3pxd2b
11_Member	GO Biological Processes	GO:0110053	regulation of actin filament organization	-3.80648	12/256	Capg,Cit,Eln,Gpr65,Stmn1,Nck2,Ptger4,Tlr2,Baiap2l2,Gsn,Kank2,Sh3pxd2b
11_Member	GO Biological Processes	GO:1902903	regulation of supramolecular fiber organization	-3.66289	14/347	Apoe,Capg,Cit,Eln,Gpr65,Stmn1,Nck2,Ptger4,Tlr2,Emilin1,Baiap2l2,Gsn,Kank2,Sh3pxd2b
11_Member	GO Biological Processes	GO:0031032	actomyosin structure organization	-3.4308	10/203	Cit,Eln,Gpr65,Stmn1,Nrap,Pdgfrb,Ptger4,Kif23,Kank2,Sh3pxd2b
11_Member	GO Biological Processes	GO:0090066	regulation of anatomical structure size	-3.28992	18/564	Adora1,Apoe,Capg,Cit,Eln,Fn1,Hsp90aa1,Htr2b,Foxc1,Nck2,Ptgs2,Sema4b,Tnf,Ezr,Tlr2,Inf2,Baiap2l2,Gsn
11_Member	GO Biological Processes	GO:0032535	regulation of cellular component size	-2.58805	13/400	Apoe,Capg,Cit,Eln,Fn1,Hsp90aa1,Nck2,Sema4b,Ezr,Tlr2,Inf2,Baiap2l2,Gsn
11_Member	GO Biological Processes	GO:0030038	contractile actin filament bundle assembly	-2.57555	6/105	Eln,Gpr65,Stmn1,Ptger4,Kank2,Sh3pxd2b
11_Member	GO Biological Processes	GO:0043149	stress fiber assembly	-2.57555	6/105	Eln,Gpr65,Stmn1,Ptger4,Kank2,Sh3pxd2b
11_Member	GO Biological Processes	GO:0051492	regulation of stress fiber assembly	-2.19302	5/89	Gpr65,Stmn1,Ptger4,Kank2,Sh3pxd2b
11_Member	GO Biological Processes	GO:0032271	regulation of protein polymerization	-2.1331	8/213	Capg,Eln,Hsp90aa1,Stmn1,Nck2,Tlr2,Baiap2l2,Gsn
11_Member	GO Biological Processes	GO:0008064	regulation of actin polymerization or depolymerization	-2.05381	7/176	Capg,Cit,Eln,Nck2,Tlr2,Baiap2l2,Gsn
11_Member	GO Biological Processes	GO:0030832	regulation of actin filament length	-2.01579	7/179	Capg,Cit,Eln,Nck2,Tlr2,Baiap2l2,Gsn
12_Summary	GO Biological Processes	GO:0050900	leukocyte migration	-9.03497	22/340	Adam8,Adora1,Bst1,C5ar1,Ch25h,Ccr1,Csf1,Ecm1,Cxcl10,Il1b,Il1rn,Lgals3,Mif,Mmp9,Ptger4,Ccl12,Cxcl2,Spp1,Tnf,Tlr2,Pla2g7,Emilin1,Nr4a1,Hspb1,Lox,Pdgfrb,Fn1,Id2,Nr4a3,Plxna2,Sema4b,Flrt2,Foxc1,Fbn1,Igf1,Gpnmb,Nes,Cd300lf
12_Member	GO Biological Processes	GO:0050900	leukocyte migration	-9.03497	22/340	Adam8,Adora1,Bst1,C5ar1,Ch25h,Ccr1,Csf1,Ecm1,Cxcl10,Il1b,Il1rn,Lgals3,Mif,Mmp9,Ptger4,Ccl12,Cxcl2,Spp1,Tnf,Tlr2,Pla2g7,Emilin1
12_Member	GO Biological Processes	GO:0002685	regulation of leukocyte migration	-8.83597	17/201	Adam8,Adora1,Bst1,C5ar1,Ccr1,Csf1,Ecm1,Cxcl10,Il1b,Lgals3,Mif,Mmp9,Ptger4,Ccl12,Tlr2,Pla2g7,Emilin1
12_Member	GO Biological Processes	GO:0097529	myeloid leukocyte migration	-7.78845	16/207	Adam8,Bst1,C5ar1,Ccr1,Csf1,Cxcl10,Il1b,Il1rn,Lgals3,Mif,Ptger4,Ccl12,Cxcl2,Spp1,Pla2g7,Emilin1
12_Member	GO Biological Processes	GO:0060326	cell chemotaxis	-7.72222	19/300	Adam8,Bst1,C5ar1,Ch25h,Ccr1,Csf1,Nr4a1,Hspb1,Cxcl10,Il1b,Il1rn,Lgals3,Lox,Mif,Pdgfrb,Ccl12,Cxcl2,Spp1,Pla2g7
12_Member	GO Biological Processes	GO:0030595	leukocyte chemotaxis	-6.83079	15/212	Adam8,Bst1,C5ar1,Ch25h,Ccr1,Csf1,Cxcl10,Il1b,Il1rn,Lgals3,Mif,Ccl12,Cxcl2,Spp1,Pla2g7
12_Member	GO Biological Processes	GO:0042330	taxis	-6.39831	25/599	Adam8,Bst1,C5ar1,Ch25h,Ccr1,Csf1,Fn1,Nr4a1,Hspb1,Id2,Cxcl10,Il1b,Il1rn,Lgals3,Lox,Mif,Nr4a3,Pdgfrb,Plxna2,Ccl12,Cxcl2,Sema4b,Spp1,Pla2g7,Flrt2
12_Member	GO Biological Processes	GO:0002687	positive regulation of leukocyte migration	-6.33227	12/144	Adam8,C5ar1,Ccr1,Csf1,Cxcl10,Il1b,Lgals3,Mmp9,Ptger4,Ccl12,Tlr2,Pla2g7
12_Member	GO Biological Processes	GO:1990266	neutrophil migration	-6.30242	11/119	Adam8,Bst1,C5ar1,Cxcl10,Il1b,Il1rn,Lgals3,Ptger4,Ccl12,Cxcl2,Spp1
12_Member	GO Biological Processes	GO:0097530	granulocyte migration	-6.2676	12/146	Adam8,Bst1,C5ar1,Csf1,Cxcl10,Il1b,Il1rn,Lgals3,Ptger4,Ccl12,Cxcl2,Spp1
12_Member	GO Biological Processes	GO:0006935	chemotaxis	-5.88731	24/596	Adam8,Bst1,C5ar1,Ch25h,Ccr1,Csf1,Fn1,Nr4a1,Hspb1,Cxcl10,Il1b,Il1rn,Lgals3,Lox,Mif,Nr4a3,Pdgfrb,Plxna2,Ccl12,Cxcl2,Sema4b,Spp1,Pla2g7,Flrt2
12_Member	GO Biological Processes	GO:0050920	regulation of chemotaxis	-5.28189	13/213	Bst1,C5ar1,Ccr1,Csf1,Fn1,Hspb1,Cxcl10,Il1b,Mif,Pdgfrb,Ccl12,Sema4b,Pla2g7
12_Member	GO Biological Processes	GO:0071621	granulocyte chemotaxis	-5.27387	10/123	Bst1,C5ar1,Csf1,Cxcl10,Il1b,Il1rn,Lgals3,Ccl12,Cxcl2,Spp1
12_Member	GO Biological Processes	GO:0030593	neutrophil chemotaxis	-5.16176	9/100	Bst1,C5ar1,Cxcl10,Il1b,Il1rn,Lgals3,Ccl12,Cxcl2,Spp1
12_Member	GO Biological Processes	GO:0002688	regulation of leukocyte chemotaxis	-4.76058	9/112	Bst1,C5ar1,Ccr1,Csf1,Cxcl10,Il1b,Mif,Ccl12,Pla2g7
12_Member	GO Biological Processes	GO:0071675	regulation of mononuclear cell migration	-4.32029	6/50	C5ar1,Ccr1,Csf1,Cxcl10,Lgals3,Pla2g7
12_Member	GO Biological Processes	GO:0050921	positive regulation of chemotaxis	-3.99765	9/140	C5ar1,Ccr1,Csf1,Fn1,Hspb1,Cxcl10,Il1b,Pdgfrb,Pla2g7
12_Member	GO Biological Processes	GO:0071674	mononuclear cell migration	-3.95309	7/83	C5ar1,Ccr1,Csf1,Cxcl10,Lgals3,Ccl12,Pla2g7
12_Member	GO Biological Processes	GO:0071677	positive regulation of mononuclear cell migration	-3.52642	4/25	Ccr1,Cxcl10,Lgals3,Pla2g7
12_Member	GO Biological Processes	GO:1990868	response to chemokine	-3.49899	6/70	Ccr1,Cxcl10,Lox,Foxc1,Ccl12,Cxcl2
12_Member	GO Biological Processes	GO:1990869	cellular response to chemokine	-3.49899	6/70	Ccr1,Cxcl10,Lox,Foxc1,Ccl12,Cxcl2
12_Member	GO Biological Processes	GO:0002548	monocyte chemotaxis	-3.11318	5/55	Ccr1,Cxcl10,Lgals3,Ccl12,Pla2g7
12_Member	GO Biological Processes	GO:0002690	positive regulation of leukocyte chemotaxis	-2.99396	6/87	C5ar1,Ccr1,Csf1,Cxcl10,Il1b,Pla2g7
12_Member	GO Biological Processes	GO:0070098	chemokine-mediated signaling pathway	-2.94042	5/60	Ccr1,Cxcl10,Foxc1,Ccl12,Cxcl2
12_Member	GO Biological Processes	GO:0090026	positive regulation of monocyte chemotaxis	-2.72944	3/19	Ccr1,Cxcl10,Pla2g7
12_Member	GO Molecular Functions	GO:0048018	receptor ligand activity	-2.67946	15/487	Csf1,Fbn1,Cxcl10,Igf1,Il1b,Il1rn,Lgals3,Mif,Ccl12,Cxcl2,Sema4b,Spp1,Tnf,Gpnmb,Flrt2
12_Member	GO Molecular Functions	GO:0005125	cytokine activity	-2.64943	9/215	Csf1,Cxcl10,Il1b,Il1rn,Mif,Ccl12,Cxcl2,Spp1,Tnf
12_Member	GO Molecular Functions	GO:0030545	receptor regulator activity	-2.39707	15/522	Csf1,Fbn1,Cxcl10,Igf1,Il1b,Il1rn,Lgals3,Mif,Ccl12,Cxcl2,Sema4b,Spp1,Tnf,Gpnmb,Flrt2
12_Member	GO Molecular Functions	GO:0005126	cytokine receptor binding	-2.36882	11/328	Csf1,Ecm1,Cxcl10,Il1b,Il1rn,Mif,Nes,Ccl12,Cxcl2,Tnf,Cd300lf
12_Member	GO Biological Processes	GO:0090025	regulation of monocyte chemotaxis	-2.33023	3/26	Ccr1,Cxcl10,Pla2g7
13_Summary	GO Molecular Functions	GO:0043394	proteoglycan binding	-9.03282	9/37	Apoe,Col5a1,Ctsb,Ctsk,Fn1,Lpl,Nid1,Gpnmb,Atp1a3,Anxa5,Bgn,Ctsg,Dcn,Fbn1,Fstl1,Cxcl10,Mpo,Thbs2,Dpysl3,Tlr2,Apob
13_Member	GO Molecular Functions	GO:0043394	proteoglycan binding	-9.03282	9/37	Apoe,Col5a1,Ctsb,Ctsk,Fn1,Lpl,Nid1,Gpnmb,Atp1a3
13_Member	GO Molecular Functions	GO:0005539	glycosaminoglycan binding	-8.51368	17/211	Anxa5,Apoe,Bgn,Col5a1,Ctsg,Dcn,Fbn1,Fn1,Fstl1,Cxcl10,Lpl,Mpo,Thbs2,Dpysl3,Tlr2,Gpnmb,Apob
13_Member	GO Molecular Functions	GO:0008201	heparin binding	-6.8456	13/155	Anxa5,Apoe,Col5a1,Ctsg,Fbn1,Fn1,Fstl1,Cxcl10,Lpl,Mpo,Thbs2,Gpnmb,Apob
13_Member	GO Molecular Functions	GO:1901681	sulfur compound binding	-5.91556	15/250	Anxa5,Apoe,Col5a1,Ctsg,Fbn1,Fn1,Fstl1,Cxcl10,Lpl,Mpo,Thbs2,Dpysl3,Gpnmb,Atp1a3,Apob
14_Summary	GO Biological Processes	GO:0007169	transmembrane receptor protein tyrosine kinase signaling pathway	-8.85037	28/557	Adora1,Cd63,Col4a1,Col4a2,Col1a1,Csf1,Dcn,Hspb1,Igf1,Igfbp5,Il1b,Stmn1,Lox,Foxc1,Mmp9,Nck2,Nr4a3,Ddr2,Pdgfrb,Enpp1,Xdh,Axl,Myo1e,Fam20c,Emilin1,Cspg4,Adamts12,Flrt2
14_Member	GO Biological Processes	GO:0007169	transmembrane receptor protein tyrosine kinase signaling pathway	-8.85037	28/557	Adora1,Cd63,Col4a1,Col4a2,Col1a1,Csf1,Dcn,Hspb1,Igf1,Igfbp5,Il1b,Stmn1,Lox,Foxc1,Mmp9,Nck2,Nr4a3,Ddr2,Pdgfrb,Enpp1,Xdh,Axl,Myo1e,Fam20c,Emilin1,Cspg4,Adamts12,Flrt2
15_Summary	GO Biological Processes	GO:1903047	mitotic cell cycle process	-8.66248	30/645	Bub1,Cdc25c,Cdkn2c,Cit,Hspa1b,Hyal1,Id2,Ier3,Igf1,Il1b,Stmn1,Mcm6,Mki67,Nek2,Pdgfrb,Kif20a,Rad51b,Ccl12,Tnf,Ttk,Ndc80,Kif18b,Kif23,Dtl,Gpnmb,Cenpf,Hspa1a,Cenpe,Kank2,Dna2,Foxc1,Mif,Aspm,Dcn,Mx1,Inf2,Nr4a1,Ptgs2,Knl1,Cenpi,Ercc6l,Nr4a3
15_Member	GO Biological Processes	GO:1903047	mitotic cell cycle process	-8.66248	30/645	Bub1,Cdc25c,Cdkn2c,Cit,Hspa1b,Hyal1,Id2,Ier3,Igf1,Il1b,Stmn1,Mcm6,Mki67,Nek2,Pdgfrb,Kif20a,Rad51b,Ccl12,Tnf,Ttk,Ndc80,Kif18b,Kif23,Dtl,Gpnmb,Cenpf,Hspa1a,Cenpe,Kank2,Dna2
15_Member	GO Biological Processes	GO:0007346	regulation of mitotic cell cycle	-7.40096	24/492	Bub1,Cdc25c,Cit,Hspa1b,Hyal1,Id2,Ier3,Igf1,Il1b,Foxc1,Mki67,Nek2,Pdgfrb,Rad51b,Ccl12,Tnf,Ttk,Ndc80,Dtl,Gpnmb,Cenpf,Hspa1a,Cenpe,Kank2
15_Member	GO Biological Processes	GO:0010564	regulation of cell cycle process	-7.19757	26/583	Bub1,Cdc25c,Cit,Hspa1b,Hyal1,Id2,Ier3,Igf1,Il1b,Mif,Mki67,Nek2,Pdgfrb,Kif20a,Rad51b,Ccl12,Tnf,Ttk,Ndc80,Kif23,Dtl,Gpnmb,Cenpf,Hspa1a,Cenpe,Kank2
15_Member	GO Biological Processes	GO:0007088	regulation of mitotic nuclear division	-6.62168	13/162	Bub1,Cit,Hspa1b,Igf1,Il1b,Mki67,Nek2,Pdgfrb,Tnf,Ttk,Ndc80,Hspa1a,Cenpe
15_Member	GO Biological Processes	GO:0140014	mitotic nuclear division	-5.76603	15/257	Bub1,Cit,Hspa1b,Igf1,Il1b,Mki67,Nek2,Pdgfrb,Tnf,Ttk,Ndc80,Kif18b,Kif23,Hspa1a,Cenpe
15_Member	GO Biological Processes	GO:0051783	regulation of nuclear division	-5.72962	13/194	Bub1,Cit,Hspa1b,Igf1,Il1b,Mki67,Nek2,Pdgfrb,Tnf,Ttk,Ndc80,Hspa1a,Cenpe
15_Member	GO Biological Processes	GO:1901990	regulation of mitotic cell cycle phase transition	-5.05548	14/258	Bub1,Cdc25c,Hyal1,Id2,Ier3,Rad51b,Ccl12,Ttk,Ndc80,Dtl,Gpnmb,Cenpf,Cenpe,Kank2
15_Member	GO Biological Processes	GO:0048285	organelle fission	-5.04123	19/451	Bub1,Aspm,Cit,Dcn,Hspa1b,Igf1,Il1b,Mki67,Mx1,Nek2,Pdgfrb,Tnf,Ttk,Ndc80,Kif18b,Inf2,Kif23,Hspa1a,Cenpe
15_Member	GO Biological Processes	GO:0044772	mitotic cell cycle phase transition	-4.68325	16/355	Bub1,Cdc25c,Cdkn2c,Cit,Hyal1,Id2,Ier3,Rad51b,Ccl12,Ttk,Ndc80,Dtl,Gpnmb,Cenpf,Cenpe,Kank2
15_Member	GO Cellular Components	GO:0000940	condensed chromosome outer kinetochore	-4.5786	4/14	Bub1,Ndc80,Cenpf,Cenpe
15_Member	GO Biological Processes	GO:0090068	positive regulation of cell cycle process	-4.57638	13/248	Cdc25c,Cit,Hyal1,Id2,Igf1,Il1b,Pdgfrb,Rad51b,Tnf,Ndc80,Kif23,Dtl,Cenpe
15_Member	GO Biological Processes	GO:0045786	negative regulation of cell cycle	-4.50626	18/450	Bub1,Cdkn2c,Nr4a1,Id2,Ier3,Foxc1,Mif,Nek2,Ptgs2,Ccl12,Tnf,Ttk,Ndc80,Dtl,Gpnmb,Cenpe,Kank2,Dna2
15_Member	GO Biological Processes	GO:1901987	regulation of cell cycle phase transition	-4.50545	14/289	Bub1,Cdc25c,Hyal1,Id2,Ier3,Rad51b,Ccl12,Ttk,Ndc80,Dtl,Gpnmb,Cenpf,Cenpe,Kank2
15_Member	GO Cellular Components	GO:0000776	kinetochore	-4.24685	9/130	Bub1,Nek2,Ttk,Ndc80,Knl1,Cenpi,Cenpf,Cenpe,Ercc6l
15_Member	GO Biological Processes	GO:0045787	positive regulation of cell cycle	-4.21887	15/347	Cdc25c,Cit,Hyal1,Id2,Igf1,Il1b,Mif,Nr4a3,Pdgfrb,Rad51b,Tnf,Ndc80,Kif23,Dtl,Cenpe
15_Member	GO Biological Processes	GO:0044770	cell cycle phase transition	-4.15487	16/393	Bub1,Cdc25c,Cdkn2c,Cit,Hyal1,Id2,Ier3,Rad51b,Ccl12,Ttk,Ndc80,Dtl,Gpnmb,Cenpf,Cenpe,Kank2
15_Member	GO Biological Processes	GO:0045931	positive regulation of mitotic cell cycle	-4.14309	10/166	Cdc25c,Hyal1,Igf1,Il1b,Pdgfrb,Rad51b,Tnf,Ndc80,Dtl,Cenpe
15_Member	GO Cellular Components	GO:0000777	condensed chromosome kinetochore	-4.11262	5/34	Bub1,Ndc80,Knl1,Cenpf,Cenpe
15_Member	GO Biological Processes	GO:0000280	nuclear division	-4.01514	16/404	Bub1,Aspm,Cit,Hspa1b,Igf1,Il1b,Mki67,Nek2,Pdgfrb,Tnf,Ttk,Ndc80,Kif18b,Kif23,Hspa1a,Cenpe
15_Member	GO Biological Processes	GO:0010948	negative regulation of cell cycle process	-3.69157	11/225	Bub1,Ier3,Mif,Nek2,Ccl12,Ttk,Ndc80,Dtl,Gpnmb,Cenpe,Kank2
15_Member	GO Cellular Components	GO:0000775	chromosome, centromeric region	-3.67903	10/189	Bub1,Mki67,Nek2,Ttk,Ndc80,Knl1,Cenpi,Cenpf,Cenpe,Ercc6l
15_Member	GO Biological Processes	GO:1901988	negative regulation of cell cycle phase transition	-3.60049	9/158	Bub1,Ier3,Ccl12,Ttk,Ndc80,Dtl,Gpnmb,Cenpe,Kank2
15_Member	GO Biological Processes	GO:0051983	regulation of chromosome segregation	-3.39674	7/102	Bub1,Cit,Mki67,Nek2,Ttk,Ndc80,Cenpe
15_Member	GO Cellular Components	GO:0000779	condensed chromosome, centromeric region	-3.30535	5/50	Bub1,Ndc80,Knl1,Cenpf,Cenpe
15_Member	GO Biological Processes	GO:1901991	negative regulation of mitotic cell cycle phase transition	-3.24739	8/141	Bub1,Ier3,Ccl12,Ttk,Ndc80,Gpnmb,Cenpe,Kank2
15_Member	GO Biological Processes	GO:0008608	attachment of spindle microtubules to kinetochore	-3.21309	4/30	Nek2,Ndc80,Knl1,Cenpe
15_Member	GO Biological Processes	GO:0000070	mitotic sister chromatid segregation	-3.187	8/144	Bub1,Cit,Nek2,Ttk,Ndc80,Kif18b,Kif23,Cenpe
15_Member	GO Biological Processes	GO:0007091	metaphase/anaphase transition of mitotic cell cycle	-3.11318	5/55	Bub1,Cit,Ttk,Ndc80,Cenpe
15_Member	GO Biological Processes	GO:0010965	regulation of mitotic sister chromatid separation	-3.07719	5/56	Bub1,Cit,Ttk,Ndc80,Cenpe
15_Member	GO Biological Processes	GO:0044784	metaphase/anaphase transition of cell cycle	-3.00742	5/58	Bub1,Cit,Ttk,Ndc80,Cenpe
15_Member	GO Biological Processes	GO:0045930	negative regulation of mitotic cell cycle	-2.9821	10/232	Bub1,Ier3,Foxc1,Ccl12,Tnf,Ttk,Ndc80,Gpnmb,Cenpe,Kank2
15_Member	GO Cellular Components	GO:0000778	condensed nuclear chromosome kinetochore	-2.95492	3/16	Bub1,Ndc80,Cenpe
15_Member	GO Biological Processes	GO:0051306	mitotic sister chromatid separation	-2.94042	5/60	Bub1,Cit,Ttk,Ndc80,Cenpe
15_Member	GO Biological Processes	GO:1905818	regulation of chromosome separation	-2.876	5/62	Bub1,Cit,Ttk,Ndc80,Cenpe
15_Member	GO Biological Processes	GO:0034501	protein localization to kinetochore	-2.87482	3/17	Ttk,Ndc80,Knl1
15_Member	GO Biological Processes	GO:0007094	mitotic spindle assembly checkpoint	-2.86238	4/37	Bub1,Ttk,Ndc80,Cenpe
15_Member	GO Biological Processes	GO:0031577	spindle checkpoint	-2.86238	4/37	Bub1,Ttk,Ndc80,Cenpe
15_Member	GO Biological Processes	GO:0071173	spindle assembly checkpoint	-2.86238	4/37	Bub1,Ttk,Ndc80,Cenpe
15_Member	GO Biological Processes	GO:0071174	mitotic spindle checkpoint	-2.86238	4/37	Bub1,Ttk,Ndc80,Cenpe
15_Member	GO Biological Processes	GO:0045841	negative regulation of mitotic metaphase/anaphase transition	-2.776	4/39	Bub1,Ttk,Ndc80,Cenpe
15_Member	GO Biological Processes	GO:2000816	negative regulation of mitotic sister chromatid separation	-2.7347	4/40	Bub1,Ttk,Ndc80,Cenpe
15_Member	GO Biological Processes	GO:0033047	regulation of mitotic sister chromatid segregation	-2.72518	5/67	Bub1,Cit,Ttk,Ndc80,Cenpe
15_Member	GO Biological Processes	GO:1902100	negative regulation of metaphase/anaphase transition of cell cycle	-2.69458	4/41	Bub1,Ttk,Ndc80,Cenpe
15_Member	GO Biological Processes	GO:0098813	nuclear chromosome segregation	-2.68982	10/254	Bub1,Cit,Nek2,Ttk,Ndc80,Kif18b,Kif23,Knl1,Cenpf,Cenpe
15_Member	GO Cellular Components	GO:0098687	chromosomal region	-2.67458	11/299	Bub1,Mki67,Nek2,Ttk,Ndc80,Knl1,Cenpi,Cenpf,Cenpe,Ercc6l,Dna2
15_Member	GO Biological Processes	GO:1905819	negative regulation of chromosome separation	-2.65557	4/42	Bub1,Ttk,Ndc80,Cenpe
15_Member	GO Biological Processes	GO:0033048	negative regulation of mitotic sister chromatid segregation	-2.61762	4/43	Bub1,Ttk,Ndc80,Cenpe
15_Member	GO Biological Processes	GO:0000819	sister chromatid segregation	-2.59914	8/178	Bub1,Cit,Nek2,Ttk,Ndc80,Kif18b,Kif23,Cenpe
15_Member	GO Biological Processes	GO:0033046	negative regulation of sister chromatid segregation	-2.54469	4/45	Bub1,Ttk,Ndc80,Cenpe
15_Member	GO Biological Processes	GO:0071459	protein localization to chromosome, centromeric region	-2.54088	3/22	Ttk,Ndc80,Knl1
15_Member	GO Biological Processes	GO:0007059	chromosome segregation	-2.52174	11/313	Bub1,Cit,Mki67,Nek2,Ttk,Ndc80,Kif18b,Kif23,Knl1,Cenpf,Cenpe
15_Member	GO Biological Processes	GO:0051985	negative regulation of chromosome segregation	-2.4421	4/48	Bub1,Ttk,Ndc80,Cenpe
15_Member	GO Biological Processes	GO:0033045	regulation of sister chromatid segregation	-2.36587	5/81	Bub1,Cit,Ttk,Ndc80,Cenpe
15_Member	GO Biological Processes	GO:0030071	regulation of mitotic metaphase/anaphase transition	-2.34675	4/51	Bub1,Ttk,Ndc80,Cenpe
15_Member	GO Biological Processes	GO:0045839	negative regulation of mitotic nuclear division	-2.25779	4/54	Bub1,Ttk,Ndc80,Cenpe
15_Member	GO Biological Processes	GO:1902099	regulation of metaphase/anaphase transition of cell cycle	-2.25779	4/54	Bub1,Ttk,Ndc80,Cenpe
15_Member	GO Cellular Components	GO:0000780	condensed nuclear chromosome, centromeric region	-2.19501	3/29	Bub1,Ndc80,Cenpe
15_Member	GO Biological Processes	GO:0051304	chromosome separation	-2.13311	5/92	Bub1,Cit,Ttk,Ndc80,Cenpe
15_Member	GO Biological Processes	GO:0000075	cell cycle checkpoint	-2.06669	7/175	Bub1,Ier3,Ttk,Ndc80,Dtl,Cenpe,Dna2
16_Summary	GO Molecular Functions	GO:0050840	extracellular matrix binding	-8.33155	10/59	Adam9,Bgn,Dcn,Ecm1,Eln,Fbln2,Lgals1,Lgals3,Nid1,Spp1
16_Member	GO Molecular Functions	GO:0050840	extracellular matrix binding	-8.33155	10/59	Adam9,Bgn,Dcn,Ecm1,Eln,Fbln2,Lgals1,Lgals3,Nid1,Spp1
16_Member	GO Molecular Functions	GO:0043236	laminin binding	-4.31286	5/31	Adam9,Ecm1,Lgals1,Lgals3,Nid1
17_Summary	GO Biological Processes	GO:0019221	cytokine-mediated signaling pathway	-8.31035	21/339	Arg1,Ccr1,Csf1,Ecm1,Cxcl10,Il1b,Il1rn,Il2rg,Foxc1,Mmp12,Ccl12,Cxcl2,Tnf,Axl,Irf7,Ikbke,Zbp1,Ifitm3,Oas2,Cd300lf,Nlrc5,Tlr2,Col3a1,Fgl2,Acod1,Lgals3,Pdcd1,Olfm4
17_Member	GO Biological Processes	GO:0019221	cytokine-mediated signaling pathway	-8.31035	21/339	Arg1,Ccr1,Csf1,Ecm1,Cxcl10,Il1b,Il1rn,Il2rg,Foxc1,Mmp12,Ccl12,Cxcl2,Tnf,Axl,Irf7,Ikbke,Zbp1,Ifitm3,Oas2,Cd300lf,Nlrc5
17_Member	GO Biological Processes	GO:0060760	positive regulation of response to cytokine stimulus	-7.79357	9/50	Csf1,Mmp12,Tlr2,Axl,Irf7,Ikbke,Zbp1,Cd300lf,Nlrc5
17_Member	GO Biological Processes	GO:0060759	regulation of response to cytokine stimulus	-7.45407	12/114	Arg1,Csf1,Ecm1,Il1rn,Mmp12,Tlr2,Axl,Irf7,Ikbke,Zbp1,Cd300lf,Nlrc5
17_Member	GO Biological Processes	GO:0001961	positive regulation of cytokine-mediated signaling pathway	-7.02327	8/44	Csf1,Mmp12,Axl,Irf7,Ikbke,Zbp1,Cd300lf,Nlrc5
17_Member	GO Biological Processes	GO:0001959	regulation of cytokine-mediated signaling pathway	-6.90154	11/104	Arg1,Csf1,Ecm1,Il1rn,Mmp12,Axl,Irf7,Ikbke,Zbp1,Cd300lf,Nlrc5
17_Member	GO Biological Processes	GO:0060337	type I interferon signaling pathway	-6.42146	7/36	Mmp12,Irf7,Ikbke,Zbp1,Ifitm3,Oas2,Nlrc5
17_Member	GO Biological Processes	GO:0071357	cellular response to type I interferon	-6.42146	7/36	Mmp12,Irf7,Ikbke,Zbp1,Ifitm3,Oas2,Nlrc5
17_Member	GO Biological Processes	GO:0060340	positive regulation of type I interferon-mediated signaling pathway	-6.34935	5/13	Mmp12,Irf7,Ikbke,Zbp1,Nlrc5
17_Member	GO Biological Processes	GO:0034340	response to type I interferon	-6.01556	7/41	Mmp12,Irf7,Ikbke,Zbp1,Ifitm3,Oas2,Nlrc5
17_Member	GO Biological Processes	GO:0050777	negative regulation of immune response	-5.17139	11/155	Arg1,Ccr1,Col3a1,Fgl2,Acod1,Lgals3,Mmp12,Pdcd1,Tnf,Olfm4,Nlrc5
17_Member	GO Biological Processes	GO:0060338	regulation of type I interferon-mediated signaling pathway	-5.08054	5/22	Mmp12,Irf7,Ikbke,Zbp1,Nlrc5
17_Member	GO Biological Processes	GO:0001960	negative regulation of cytokine-mediated signaling pathway	-3.34647	5/49	Arg1,Ecm1,Il1rn,Mmp12,Nlrc5
17_Member	GO Biological Processes	GO:0060761	negative regulation of response to cytokine stimulus	-3.18751	5/53	Arg1,Ecm1,Il1rn,Mmp12,Nlrc5
17_Member	GO Biological Processes	GO:0045824	negative regulation of innate immune response	-3.04195	5/57	Arg1,Ccr1,Acod1,Mmp12,Nlrc5
18_Summary	GO Biological Processes	GO:0019915	lipid storage	-7.71131	10/68	Plin2,Apoe,Ehd1,Il1b,Lpl,Enpp1,Msr1,Tnf,Ikbke,Apob,Fabp3,Mif,Spp1,Anxa5,Aspm,Fbn1,Htr2b,Cxcl10,Lgals1,Lgals3,Gsn,Mpo,Pla2g7,Apoc1,Csf1,Atp10a,Adora1,Cyp1b1,Pld3,Hcar2,Nceh1,Angptl4,Atp1a3,C5ar1,Tlr2,Gk
18_Member	GO Biological Processes	GO:0019915	lipid storage	-7.71131	10/68	Plin2,Apoe,Ehd1,Il1b,Lpl,Enpp1,Msr1,Tnf,Ikbke,Apob
18_Member	GO Biological Processes	GO:1905954	positive regulation of lipid localization	-6.57373	10/89	Apoe,Ehd1,Fabp3,Il1b,Lpl,Mif,Msr1,Spp1,Ikbke,Apob
18_Member	GO Biological Processes	GO:0051235	maintenance of location	-6.53182	18/322	Plin2,Anxa5,Apoe,Aspm,Ehd1,Fbn1,Htr2b,Cxcl10,Il1b,Lgals1,Lgals3,Lpl,Enpp1,Msr1,Tnf,Ikbke,Gsn,Apob
18_Member	GO Biological Processes	GO:0010886	positive regulation of cholesterol storage	-6.00337	4/7	Ehd1,Lpl,Msr1,Apob
18_Member	GO Biological Processes	GO:0034374	low-density lipoprotein particle remodeling	-5.45611	4/9	Apoe,Mpo,Pla2g7,Apob
18_Member	GO Cellular Components	GO:0034358	plasma lipoprotein particle	-5.31627	6/34	Apoc1,Apoe,Lpl,Msr1,Pla2g7,Apob
18_Member	GO Cellular Components	GO:1990777	lipoprotein particle	-5.31627	6/34	Apoc1,Apoe,Lpl,Msr1,Pla2g7,Apob
18_Member	GO Biological Processes	GO:0034368	protein-lipid complex remodeling	-5.30126	5/20	Apoe,Lpl,Mpo,Pla2g7,Apob
18_Member	GO Biological Processes	GO:0034369	plasma lipoprotein particle remodeling	-5.30126	5/20	Apoe,Lpl,Mpo,Pla2g7,Apob
18_Member	GO Biological Processes	GO:0034367	protein-containing complex remodeling	-5.18784	5/21	Apoe,Lpl,Mpo,Pla2g7,Apob
18_Member	GO Cellular Components	GO:0032994	protein-lipid complex	-5.16499	6/36	Apoc1,Apoe,Lpl,Msr1,Pla2g7,Apob
18_Member	GO Biological Processes	GO:0010884	positive regulation of lipid storage	-5.08054	5/22	Ehd1,Lpl,Msr1,Ikbke,Apob
18_Member	GO Biological Processes	GO:0010744	positive regulation of macrophage derived foam cell differentiation	-5.04699	4/11	Csf1,Lpl,Msr1,Apob
18_Member	GO Biological Processes	GO:0097006	regulation of plasma lipoprotein particle levels	-4.82493	7/61	Apoe,Ehd1,Lpl,Mpo,Msr1,Pla2g7,Apob
18_Member	GO Biological Processes	GO:0010885	regulation of cholesterol storage	-4.72022	4/13	Ehd1,Lpl,Msr1,Apob
18_Member	GO Cellular Components	GO:0034362	low-density lipoprotein particle	-4.72022	4/13	Apoe,Msr1,Pla2g7,Apob
18_Member	GO Biological Processes	GO:1905952	regulation of lipid localization	-4.64368	10/145	Apoe,Ehd1,Fabp3,Il1b,Lpl,Mif,Msr1,Spp1,Ikbke,Apob
18_Member	GO Biological Processes	GO:0010878	cholesterol storage	-4.44841	4/15	Ehd1,Lpl,Msr1,Apob
18_Member	GO Biological Processes	GO:0071827	plasma lipoprotein particle organization	-4.17704	5/33	Apoe,Lpl,Mpo,Pla2g7,Apob
18_Member	GO Cellular Components	GO:0034361	very-low-density lipoprotein particle	-4.11133	4/18	Apoc1,Apoe,Lpl,Apob
18_Member	GO Cellular Components	GO:0034385	triglyceride-rich plasma lipoprotein particle	-4.11133	4/18	Apoc1,Apoe,Lpl,Apob
18_Member	GO Biological Processes	GO:0010876	lipid localization	-3.94772	15/367	Plin2,Apoc1,Apoe,Atp10a,Ehd1,Fabp3,Il1b,Lpl,Mif,Enpp1,Msr1,Spp1,Tnf,Ikbke,Apob
18_Member	GO Biological Processes	GO:0071825	protein-lipid complex subunit organization	-3.93165	5/37	Apoe,Lpl,Mpo,Pla2g7,Apob
18_Member	GO Biological Processes	GO:0010743	regulation of macrophage derived foam cell differentiation	-3.83348	4/21	Csf1,Lpl,Msr1,Apob
18_Member	GO Biological Processes	GO:0010883	regulation of lipid storage	-3.66454	5/42	Ehd1,Lpl,Msr1,Ikbke,Apob
18_Member	GO Biological Processes	GO:0010742	macrophage derived foam cell differentiation	-3.52642	4/25	Csf1,Lpl,Msr1,Apob
18_Member	GO Biological Processes	GO:0090077	foam cell differentiation	-3.45835	4/26	Csf1,Lpl,Msr1,Apob
18_Member	GO Cellular Components	GO:0042627	chylomicron	-3.34377	3/12	Apoe,Lpl,Apob
18_Member	GO Biological Processes	GO:0016042	lipid catabolic process	-3.14563	12/303	Adora1,Apoe,Cyp1b1,Il1b,Lpl,Pld3,Spp1,Tnf,Pla2g7,Hcar2,Apob,Nceh1
18_Member	GO Biological Processes	GO:0034381	plasma lipoprotein particle clearance	-2.95429	4/35	Apoe,Ehd1,Msr1,Apob
18_Member	GO Biological Processes	GO:0055090	acylglycerol homeostasis	-2.95429	4/35	Adora1,Apoe,Lpl,Angptl4
18_Member	GO Biological Processes	GO:0070328	triglyceride homeostasis	-2.95429	4/35	Adora1,Apoe,Lpl,Angptl4
18_Member	GO Molecular Functions	GO:0043395	heparan sulfate proteoglycan binding	-2.72944	3/19	Apoe,Lpl,Atp1a3
18_Member	GO Biological Processes	GO:0055088	lipid homeostasis	-2.57415	7/141	Adora1,Apoe,Ehd1,Fabp3,Lpl,Angptl4,Apob
18_Member	GO Biological Processes	GO:0019433	triglyceride catabolic process	-2.37928	3/25	Apoe,Lpl,Apob
18_Member	GO Biological Processes	GO:0042632	cholesterol homeostasis	-2.27693	5/85	Apoe,Ehd1,Fabp3,Lpl,Apob
18_Member	GO Biological Processes	GO:0055092	sterol homeostasis	-2.2555	5/86	Apoe,Ehd1,Fabp3,Lpl,Apob
18_Member	GO Molecular Functions	GO:0071813	lipoprotein particle binding	-2.23825	3/28	Apoe,Lpl,Msr1
18_Member	GO Molecular Functions	GO:0071814	protein-lipid complex binding	-2.23825	3/28	Apoe,Lpl,Msr1
18_Member	GO Biological Processes	GO:0097242	amyloid-beta clearance	-2.19501	3/29	Apoe,C5ar1,Msr1
18_Member	GO Molecular Functions	GO:0001540	amyloid-beta binding	-2.12181	4/59	Apoe,Msr1,Tlr2,Atp1a3
18_Member	GO Biological Processes	GO:0006641	triglyceride metabolic process	-2.02035	5/98	Apoc1,Apoe,Gk,Lpl,Apob
18_Member	GO Biological Processes	GO:0046461	neutral lipid catabolic process	-2.00169	3/34	Apoe,Lpl,Apob
18_Member	GO Biological Processes	GO:0046464	acylglycerol catabolic process	-2.00169	3/34	Apoe,Lpl,Apob
19_Summary	GO Molecular Functions	GO:0005518	collagen binding	-7.64832	10/69	Adam9,Serpinh1,Ctsb,Ctsk,Dcn,Mmp12,Nid1,Ddr2,Vwf,Cspg4
19_Member	GO Molecular Functions	GO:0005518	collagen binding	-7.64832	10/69	Adam9,Serpinh1,Ctsb,Ctsk,Dcn,Mmp12,Nid1,Ddr2,Vwf,Cspg4
20_Summary	GO Biological Processes	GO:0001501	skeletal system development	-6.81567	24/529	Serpinh1,Col12a1,Col5a2,Col6a1,Col7a1,Col1a1,Col1a2,Ctsk,Ecm1,Fbn1,Hspg2,Hyal1,Igf1,Lgals3,Lox,Foxc1,Mgp,Mmp9,Pdgfrb,Ptger4,Fam20c,Etl4,Adamts12,Sh3pxd2b,Col5a1,Csf1,Id2,Ddr2
20_Member	GO Biological Processes	GO:0001501	skeletal system development	-6.81567	24/529	Serpinh1,Col12a1,Col5a2,Col6a1,Col7a1,Col1a1,Col1a2,Ctsk,Ecm1,Fbn1,Hspg2,Hyal1,Igf1,Lgals3,Lox,Foxc1,Mgp,Mmp9,Pdgfrb,Ptger4,Fam20c,Etl4,Adamts12,Sh3pxd2b
20_Member	GO Biological Processes	GO:0061448	connective tissue development	-6.65972	17/282	Serpinh1,Col12a1,Col5a1,Col6a1,Col7a1,Col1a1,Csf1,Ctsk,Ecm1,Hspg2,Id2,Igf1,Lox,Mgp,Pdgfrb,Adamts12,Sh3pxd2b
20_Member	GO Biological Processes	GO:0060348	bone development	-4.92201	13/230	Serpinh1,Col12a1,Col6a1,Col7a1,Col1a1,Fbn1,Hspg2,Igf1,Lox,Foxc1,Ptger4,Fam20c,Sh3pxd2b
20_Member	GO Biological Processes	GO:0060351	cartilage development involved in endochondral bone morphogenesis	-4.22222	6/52	Serpinh1,Col12a1,Col6a1,Col7a1,Col1a1,Hspg2
20_Member	GO Biological Processes	GO:0060350	endochondral bone morphogenesis	-4.19776	7/76	Serpinh1,Col12a1,Col6a1,Col7a1,Col1a1,Hspg2,Foxc1
20_Member	GO Biological Processes	GO:0003433	chondrocyte development involved in endochondral bone morphogenesis	-3.75083	4/22	Serpinh1,Col12a1,Col6a1,Col7a1
20_Member	GO Biological Processes	GO:0003416	endochondral bone growth	-3.6155	5/43	Col12a1,Col6a1,Col7a1,Ecm1,Ddr2
20_Member	GO Biological Processes	GO:0002063	chondrocyte development	-3.52125	5/45	Serpinh1,Col12a1,Col6a1,Col7a1,Ecm1
20_Member	GO Biological Processes	GO:0098868	bone growth	-3.47592	5/46	Col12a1,Col6a1,Col7a1,Ecm1,Ddr2
20_Member	GO Biological Processes	GO:0051216	cartilage development	-3.33119	10/209	Serpinh1,Col12a1,Col6a1,Col7a1,Col1a1,Ctsk,Ecm1,Hspg2,Mgp,Adamts12
20_Member	GO Biological Processes	GO:0003413	chondrocyte differentiation involved in endochondral bone morphogenesis	-3.27076	4/29	Serpinh1,Col12a1,Col6a1,Col7a1
20_Member	GO Biological Processes	GO:0060349	bone morphogenesis	-3.0182	7/118	Serpinh1,Col12a1,Col6a1,Col7a1,Col1a1,Hspg2,Foxc1
20_Member	GO Biological Processes	GO:0003414	chondrocyte morphogenesis involved in endochondral bone morphogenesis	-2.95492	3/16	Col12a1,Col6a1,Col7a1
20_Member	GO Biological Processes	GO:0003429	growth plate cartilage chondrocyte morphogenesis	-2.95492	3/16	Col12a1,Col6a1,Col7a1
20_Member	GO Biological Processes	GO:0090171	chondrocyte morphogenesis	-2.95492	3/16	Col12a1,Col6a1,Col7a1
20_Member	GO Biological Processes	GO:0002062	chondrocyte differentiation	-2.95431	7/121	Serpinh1,Col12a1,Col6a1,Col7a1,Ecm1,Hspg2,Adamts12
20_Member	GO Biological Processes	GO:0003422	growth plate cartilage morphogenesis	-2.87482	3/17	Col12a1,Col6a1,Col7a1
20_Member	GO Biological Processes	GO:0048705	skeletal system morphogenesis	-2.59219	10/262	Serpinh1,Col12a1,Col6a1,Col7a1,Col1a1,Hspg2,Hyal1,Foxc1,Pdgfrb,Sh3pxd2b
20_Member	GO Biological Processes	GO:0003418	growth plate cartilage chondrocyte differentiation	-2.54088	3/22	Col12a1,Col6a1,Col7a1
20_Member	GO Biological Processes	GO:0060536	cartilage morphogenesis	-2.28327	3/27	Col12a1,Col6a1,Col7a1
20_Member	GO Biological Processes	GO:0035265	organ growth	-2.10972	8/215	Col12a1,Col6a1,Col7a1,Ecm1,Igf1,Foxc1,Ddr2,Pdgfrb
